# Supplementary material
Source: ML conference proceedings conference paper supplement (https://openreview.net/forum?id=a01qbkxbve)
Supplement: supplementary_material [file attachment]

---

## APPENDIX CONTENTS

|                                                                                       |           |
|---------------------------------------------------------------------------------------|-----------|
| <b>A Details of Implementation and Extra Results</b>                                  | <b>15</b> |
| A.1 Offline Data Collection and Usage                                                 | 15        |
| A.2 Additional Results                                                                | 16        |
| A.2.1 ALFWorld                                                                        | 16        |
| A.2.2 WebShop                                                                         | 17        |
| <b>B Prompts and Learned Knowledge</b>                                                | <b>18</b> |
| B.1 Text-based Policy                                                                 | 18        |
| B.1.1 Skill Discovery Prompt                                                          | 18        |
| ALFWorld: Skill discovery prompt                                                      | 18        |
| WebShop: Skill discovery prompt                                                       | 19        |
| B.1.2 Primitive Discovery Prompt                                                      | 21        |
| ALFWorld: Skill-conditioned primitive discovery prompt                                | 21        |
| WebShop: Skill-conditioned primitive discovery prompt                                 | 22        |
| B.1.3 Skill-conditioned Policy Improvement Tips Distillation Prompt                   | 23        |
| ALFWorld: Policy improvement tips contrastive distillation prompt                     | 23        |
| ALFWorld: Policy improvement tips non-contrastive distillation prompt                 | 24        |
| WebShop: Policy improvement tips contrastive distillation prompt                      | 25        |
| WebShop: Policy improvement tips non-contrastive distillation prompt                  | 27        |
| B.1.4 Prompts for Downstream Task Solving                                             | 28        |
| ALFWorld: Base policy prompt                                                          | 28        |
| ALFWorld: subtask skill-conditioned policy prompt template                            | 31        |
| ALFWorld: subtask skill-conditioned policy prompt for <code>heat(object)</code>       | 32        |
| WebShop: Base policy prompt                                                           | 33        |
| WebShop: skill-conditioned policy prompt template                                     | 35        |
| WebShop: skill-conditioned policy prompt for <code>select_item_attributes()</code>    | 35        |
| B.2 Code-based Policy                                                                 | 37        |
| ALFWorld: Skill discovery                                                             | 37        |
| WebShop: Skill discovery                                                              | 39        |
| Webshop: Skill discovery                                                              | 40        |
| B.3 Human-Generated Policy Improvement Tips and Primitives for Each Skill             | 42        |
| B.3.1 ALFWorld                                                                        | 42        |
| ALFWorld: Policy improvement tips and primitives for skill <code>clean(object)</code> | 42        |
| ALFWorld: Policy improvement tips and primitives for skill <code>cool(object)</code>  | 42        |
| ALFWorld: Policy improvement tips and primitives for skill <code>find(object)</code>  | 43        |
| ALFWorld: Policy improvement tips and primitives for skill <code>heat(object)</code>  | 43        |

|                                                                                    |    |
|------------------------------------------------------------------------------------|----|
| ALFWorld: Policy improvement tips and primitives for skill put(object, receptacle) | 43 |
| ALFWorld: Policy improvement tips and primitives for skill take(object)            | 44 |
| ALFWorld: Policy improvement tips and primitives for skill use(object)             | 44 |
| B.3.2 WebShop                                                                      | 44 |
| WebShop: Policy improvement tips and primitives for skill search_item()            | 44 |
| WebShop: Policy improvement tips and primitives for skill select_item()            | 44 |
| WebShop: Policy improvement tips and primitives for skill select_item_attributes() | 45 |
| WebShop: Policy improvement tips and primitives for skill purchase_item()          | 45 |
| B.4 LLM-Distilled Policy Improvement Tips and Primitives for Each Skill            | 45 |
| B.4.1 ALFWorld                                                                     | 45 |
| ALFWorld: Policy improvement tips and primitives for skill clean(object)           | 45 |
| ALFWorld: Policy improvement tips and primitives for skill cool(object)            | 45 |
| ALFWorld: Policy improvement tips and primitives for skill find(object)            | 46 |
| ALFWorld: Policy improvement tips and primitives for skill heat(object)            | 46 |
| ALFWorld: Policy improvement tips and primitives for skill put(object, receptacle) | 47 |
| ALFWorld: Policy improvement tips and primitives for skill take(object)            | 48 |
| ALFWorld: Policy improvement tips and primitives for skill use(object)             | 48 |
| B.4.2 WebShop                                                                      | 48 |
| WebShop: Policy improvement tips and primitives for skill purchase_item()          | 48 |
| WebShop: Policy improvement tips and primitives for skill search_item()            | 49 |
| WebShop: Policy improvement tips and primitives for skill select_item_attributes() | 49 |
| WebShop: Policy improvement tips and primitives for skill select_item()            | 50 |
| B.5 Ablation Study and Discussion on Policy Improvement Tips                       | 50 |
| B.5.1 Tip Distillation Only (TD-Only) Prompts                                      | 50 |
| ALFWorld: Contrastive tip distillation prompt                                      | 50 |
| ALFWorld: Non-contrastive tip distillation prompt                                  | 51 |
| WebShop: Contrastive tip distillation prompt                                       | 52 |
| WebShop: Non-contrastive tip distillation prompt                                   | 54 |
| B.5.2 Results in ALFWorld                                                          | 56 |
| ALFWorld: Distilled policy improvement tips with contrastive prompt                | 56 |
| ALFWorld: Distilled policy improvement tips with non-contrastive prompt            | 56 |
| ALFWorld: Human distilled tips and primitives                                      | 57 |
| B.5.3 Results in WebShop                                                           | 58 |
| WebShop: Distilled policy improvement tips with contrastive prompt                 | 58 |
| WebShop: Distilled policy improvement tips with non-contrastive prompt             | 59 |
| WebShop: Human distilled tips and primitives                                       | 59 |

---

|                                                |    |
|------------------------------------------------|----|
| B.6 Generated Code . . . . .                   | 60 |
| B.6.1 ALFWorld . . . . .                       | 60 |
| ALFworld: Generated skill code . . . . .       | 60 |
| ALFworld: Skill Composition . . . . .          | 61 |
| B.6.2 WebShop . . . . .                        | 62 |
| Webshop: Generated skill code . . . . .        | 62 |
| Webshop: Skill Composition (GPT-4) . . . . .   | 62 |
| Webshop: Skill Composition (GPT-3.5) . . . . . | 63 |

## A DETAILS OF IMPLEMENTATION AND EXTRA RESULTS

### A.1 OFFLINE DATA COLLECTION AND USAGE

The offline dataset used in our experiment consists of both success and failure interaction trajectories. The success data in ALFWorld are gathered from a 'traj.json' file in the training dataset provided on their official website. We download human demonstrations from the official website of WebShop, and we select out the demonstrations with 100% product matching score from the training dataset as the success data. We generate the failure data by running ReAct with GPT-3.5-0301 on ALFWorld and running ReAct with GPT-3.5-0613 on the WebShop, which are both conducted on the training task set. Eventually, we have totally 80 pairs of success trajectories and failure trajectories on the same tasks in ALFWorld and 90 pairs of success trajectories and corresponding failure trajectories in WebShop.

In Table 4, we detail the usage of the offline data for discovering primitives and skills and distilling policy improvement tips. We use GPT-4-0613 for all discovery and distillation processes. In our experiments, we note that the batch size may impact the quality of results. The tips distillation in O3D is skill-oriented, where we need contrastive data pairs for each skill. Among the first 30 offline data pairs, certain skills have zero failure data (e.g., cool) as the mistakes happened in other skills. We, therefore, generate more offline data (80) for the tips distillation part of O3D.

Table 3: Details of offline data usage in ALFworld

| Method           | Component            | Data Type         | Batch Size | # of Trajs    |
|------------------|----------------------|-------------------|------------|---------------|
| O3D              | Skill Discovery      | success           | 1          | 6             |
|                  | Primitives Discovery | success           | 1          | 12            |
|                  | Tips Distillation    | success & failure | 1          | $80 \times 2$ |
| O3D (SD-only)    | Skill Discovery      | success           | 1          | 6             |
| O3D (PD-only)    | Primitives Discovery | success           | 1          | 12            |
| O3D (TD-only)    | Tips Distillation    | success & failure | 2          | $30 \times 2$ |
| O3D (TD-only NC) | Tips Distillation    | success           | 2          | 30            |

Table 4: Details of offline data usage for in WebShop

| Method           | Component            | Data Type         | Batch Size | # of Trajs    |
|------------------|----------------------|-------------------|------------|---------------|
| O3D              | Skill Discovery      | success           | 2          | 30            |
|                  | Primitives Discovery | success           | 1          | 90            |
|                  | Tips Distillation    | success & failure | 1          | $30 \times 2$ |
| O3D (SD-only)    | Skill Discovery      | success           | 2          | 30            |
| O3D (PD-only)    | Primitives Discovery | success           | 1          | 90            |
| O3D (TD-only)    | Tips Distillation    | success & failure | 1          | $30 \times 2$ |
| O3D (TD-only NC) | Tips Distillation    | success           | 1          | 30            |

## A.2 ADDITIONAL RESULTS

In this section, we present additional experimental results in ALFWorld and WebShop domains.

### A.2.1 ALFWORLD

We show an extra comparison between O3D-Code and Demo2Code in Table 5 where O3D-Code also outperforms the baseline method.

Table 5: Results of Code-based-Policy in ALFWorld

| Model        | Method    | Pick      | Clean     | Heat      | Cool      | Look      | Pick2     | SR          |
|--------------|-----------|-----------|-----------|-----------|-----------|-----------|-----------|-------------|
| GPT-3.5-0301 | Demo2Code | 23        | 18        | 3         | 9         | 0         | 11        | 0.48        |
|              | O3D-Code  | <b>24</b> | <b>26</b> | <b>20</b> | <b>19</b> | <b>16</b> | <b>15</b> | <b>0.90</b> |

In our ablation study, we also further visualize the performance of the three variants of O3D under each type of task with three different models, as shown in Fig 6. From the perspective of each task type, the advantage of the three variants of O3D versus ReAct is a bit model-dependent, but overall, they outperform ReAct as shown in the last column of Fig. 6.

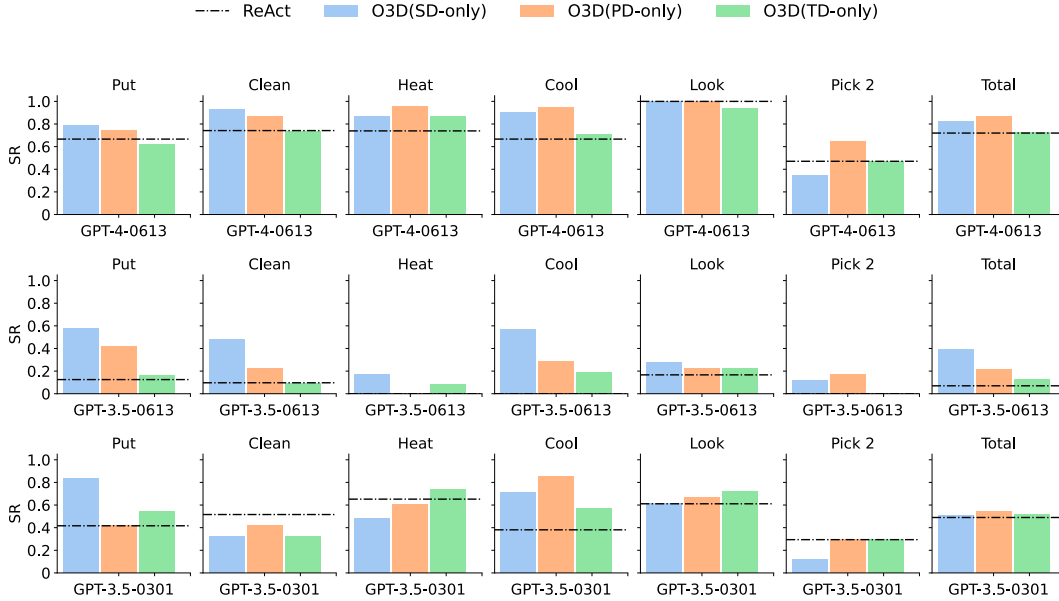

Figure 6: Comparison on success rate (SR) with three variants of O3D against the baseline method.

We also conduct experiments to investigate whether the policy improvement tips distilled for text-based policy can improve the performance of code-based policy or not. As the results shown in Fig. 7 in ALFWorld, the tips distilled with the contrastive approach and the non-contrastive approach both have a minor contribution to the improvement of code-based policy.

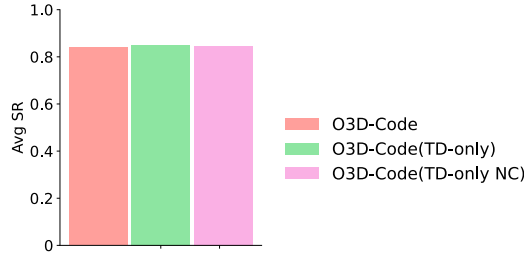

Figure 7: Results of O3D-Code with the tips distilled via contrastive and non-contrastive ways against the original O3D-Code in ALFWorld. We measure the averaged success rate over the three GPT models as the performance of each method.

### A.2.2 WEBSHOP

We show the performance of the three variants of O3D on the product matching score against the baseline in Fig 8. With GP4-0613 and GPT-3.5-0613, the three variants of O3D all outperform ReAct, which validates the contribution of the offline data-driven discovery and distillation to policy improvement. With the model GPT-3.5-0301, O3D (TD-only) performs worse than ReAct. We suspect that this is because the offline data was generated by running ReAct using GPT-3.5-0613 that reaches a much higher score than running ReAct using GPT-3.5-0301. Thus, the tips distilled from the offline data would be less helpful to correct the mistakes made by a worse model, GPT-3.5-0301.

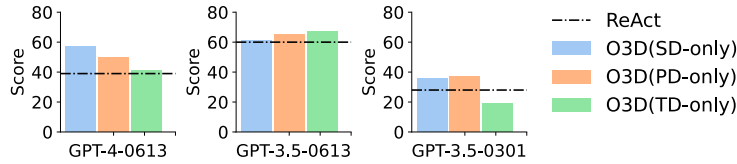

Figure 8: Comparison on the product matching score with three variants of O3D against the baseline method.

In WebShop, as the results shown in Fig 9, the tips distilled for text-based policy is not helpful for the improvement of code-based policy.

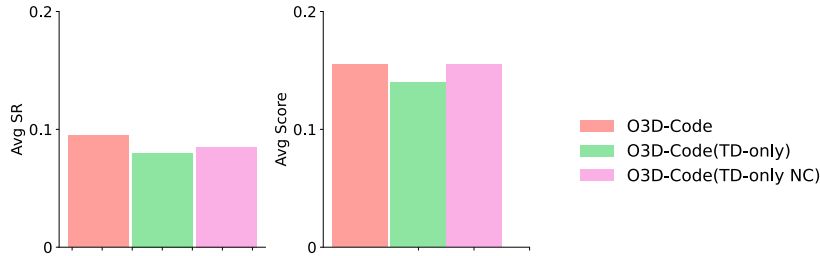

Figure 9: Results of O3D-Code with the tips distilled via contrastive and non-contrastive ways against the original O3D-Code in WebShop. We measure the averaged success rate and the averaged product matching score over GPT-4-0613 and GPT-3.5-16K-0613 as the performance of each method.

---

## B PROMPTS AND LEARNED KNOWLEDGE

### B.1 TEXT-BASED POLICY

#### B.1.1 SKILL DISCOVERY PROMPT

| ALFWorld: Skill discovery prompt                                                                                                                                                                                                                                                                                                                                                                                                                                                                                                                                                                                                                                                                                                                                                                                                                                                                                                                                                                                                                                                                                                                                                                                                                                                                                                                                                                                                                                                                                                                                                                                                                                                                                                                                                                                                                                                                                                                                                                                                                                                                                                                                                                                                                                                                                                                                                                                                                                                                                                                                                                                                                         |
|----------------------------------------------------------------------------------------------------------------------------------------------------------------------------------------------------------------------------------------------------------------------------------------------------------------------------------------------------------------------------------------------------------------------------------------------------------------------------------------------------------------------------------------------------------------------------------------------------------------------------------------------------------------------------------------------------------------------------------------------------------------------------------------------------------------------------------------------------------------------------------------------------------------------------------------------------------------------------------------------------------------------------------------------------------------------------------------------------------------------------------------------------------------------------------------------------------------------------------------------------------------------------------------------------------------------------------------------------------------------------------------------------------------------------------------------------------------------------------------------------------------------------------------------------------------------------------------------------------------------------------------------------------------------------------------------------------------------------------------------------------------------------------------------------------------------------------------------------------------------------------------------------------------------------------------------------------------------------------------------------------------------------------------------------------------------------------------------------------------------------------------------------------------------------------------------------------------------------------------------------------------------------------------------------------------------------------------------------------------------------------------------------------------------------------------------------------------------------------------------------------------------------------------------------------------------------------------------------------------------------------------------------------|
| <p>You will be given the interaction histories between an agent and a household environment. Break the full interaction log into several sub-tasks, and summarize these sub-tasks in an abstract way. When there is already a list of environment-specific subtasks to start with, please keep them in your response or improve them if you figure out any mistakes, and you can also append new subtasks according to the given new trial. You should not add duplicate subtasks. Give your response after "New summarization: "</p> <p>Here is an example:</p> <p>Task 1:<br/>Success trial:<br/>You are in the middle of a room. Looking quickly around you, you see a cabinet 4, a cabinet 3, a cabinet 2, a cabinet 1, a coffeemachine 1, a countertop 1, a diningtable 3, a diningtable 2, a diningtable 1, a drawer 1, a fridge 1, a garbagecan 1, a microwave 1, a sidetable 1, a sinkbasin 1, a stoveburner 4, a stoveburner 3, a stoveburner 2, a stoveburner 1, and a toaster 1.<br/>Your task is to: find some apple and put it in sidetable.<br/>&gt; go to fridge 1<br/>The fridge 1 is closed.<br/>&gt; open fridge 1<br/>You open the fridge 1. The fridge 1 is open. In it, you see a lettuce 2, a mug 2, a potato 2, and a tomato 1.<br/>&gt; close fridge 1<br/>&gt; go to garbagecan 1<br/>On the garbagecan 1, you see a apple 3, and a egg 3.<br/>&gt; take apple 3 from garbagecan 1<br/>You pick up the apple 3 from the garbagecan 1.<br/>&gt; go to sidetable 1<br/>On the sidetable 1, you see a cup 1, a lettuce 1, a peppershaker 3, a potato 1, and a saltshaker 1.<br/>&gt; put apple 3 in/on sidetable 1<br/>You put the apple 3 in/on the sidetable 1.</p> <p>Here is no list of subtasks to start with.</p> <p>New summarization:</p> <p>In the above interaction log, the agent completes three subtasks: find(apple) including "go to", "open" and "close" as primitive operations. take(apple) including "take" as primitive operations, and put(apple, sidetable) including "go to" and "put" as primitive operations. We thus can segment the entire log based on these three subtasks below.</p> <p>You are in the middle of a room. Looking quickly around you, you see a cabinet 4, a cabinet 3, a cabinet 2, a cabinet 1, a coffeemachine 1, a countertop 1, a diningtable 3, a diningtable 2, a diningtable 1, a drawer 1, a fridge 1, a garbagecan 1, a microwave 1, a sidetable 1, a sinkbasin 1, a stoveburner 4, a stoveburner 3, a stoveburner 2, a stoveburner 1, and a toaster 1.<br/>Your task is to: find some apple and put it in sidetable.</p> <p>- find(apple):<br/>    &gt; go to fridge 1</p> |

```

    The fridge 1 is closed.
    > open fridge 1
    You open the fridge 1. The fridge 1 is open. In it, you see a
    lettuce 2, a mug 2, a potato 2, and a tomato 1.
    > close fridge 1
    You close fridge 1.
    > go to garbagecan 1
    On the garbagecan 1, you see a apple 3, and a egg 3.
- take(apple):
    > take apple 3 from garbagecan 1
    You pick up the apple 3 from the garbagecan 1.
- put(apple, sidetable):
    > go to sidetable 1
    On the sidetable 1, you see a cup 1, a lettuce 1, a peppershaker
    3, a potato 1, and a saltshaker 1.
    > put apple 3 in/on sidetable 1
    You put the apple 3 in/on the sidetable 1.

```

As there is no a list of subtasks to start with, we list the  
Enviroment-specific subtasks below:

```

- find(object)
- take(object)
- put(object, receptable)

```

#### WebShop: Skill discovery prompt

You will be given the interaction histories between an agent and a webshop environment. Break the full interaction log into several sub-tasks, and summarize these sub-tasks in an abstrat way. When there is already a list of environment-specific subtasks to start with, please keep them in your response or improve them if you figure out any mistakes, and you can also append new subtasks according to the given new trial. You should not add duplicate subtasks. Give your response after "New summarization: "

Here is an example:

Task 1:

Success trial:

WebShop

Instruction:

i'm looking for a light pink long handle back loofah shower brush,  
and price lower than 40.00 dollars

[Search]

Action: search[light pink long handle back loofah shower brush]

Observation:

[Back to Search]

Page 1 (Total results: 50)

[Next >]

[B09N8YLMGJ]

JulaJuyo Shower Back Scrubber, Long Handle Bath Body Brush

Exfoliating Loofah Sponge on a Stick for Men Women, Colorful Nylon

Mesh Showering Bathing Luffa Cleaning Lufa Washer Brush (1 Pack-Gray)

\\$7.99

[B09J8KGN4P]

JulaJuyo Back Scrubber for Shower, Long Handle Body Bath Brush

Showering Loofah Sponge on a Stick for Men Women, Nylon Mesh

Exfoliating Bathing Luffa Scrub Shower Cleaning Luffa Brush (1

Pack-White)

\\$7.99

[B08Y6VZFT6]

Prozklves Back Scrubber for Shower, Long Handle Back Loofah Shower Brush, Soft Nylon Mesh Back Cleaner Washer, Bath Brush for Women Men, Exfoliating Body Scrubber for Elderly (Light Pink)  
\\$7.99

Action: click[B08Y6VZFT6]

Observation:

[Back to Search]

[< Prev]

scent [2 pack-beige][2 pack-green][2 pack-light pink][2 pcs=green+beige][2 pcs=green+pink][3 pack-beige][3 pack-light pink][3 pcs=colors][beige][green][light pink]

Prozklves Back Scrubber for Shower, Long Handle Back Loofah Shower Brush, Soft Nylon Mesh Back Cleaner Washer, Bath Brush for Women Men, Exfoliating Body Scrubber for Elderly (Light Pink)

Price:\\$7.99

Rating: N.A.

[Description]

[Features]

[Reviews]

[Attributes]

[Buy Now]

Here is no list of subtasks to start with.

New summarization:

In the above interaction log, the agent completes two subtasks: search\_item() with the purpose of searching for the required item, including "search[QUERY]" as primitive operation, as well as select\_item() with the purpose of selecting the item that matches the requirement, including "click[ITEM\_TITLE]" as a primitive operation. We thus can segment the entire log based on these two subtasks below.

WebShop

Instruction:

i'm looking for a light pink long handle back loofah shower brush, and price lower than 40.00 dollars

[Search]

- search\_item():

Action: search[light pink long handle back loofah shower brush]

Observation:

[Back to Search]

Page 1 (Total results: 50)

[Next >]

[B09N8YLMGJ]

JulaJuyo Shower Back Scrubber, Long Handle Bath Body Brush  
Exfoliating Loofah Sponge on a Stick for Men Women, Colorful Nylon Mesh Showering Bathing Luffa Cleaning Lufa Washer Brush (1 Pack-Gray)  
\\$7.99

[B09J8KGN4P]

JulaJuyo Back Scrubber for Shower, Long Handle Body Bath  
Brush Showering Loofah Sponge on a Stick for Men Women, Nylon Mesh Exfoliating Bathing Lufa Scrub Shower Cleaning Luffa Brush (1 Pack-White)  
\\$7.99

[B08Y6VZFT6]

Prozklves Back Scrubber for Shower, Long Handle Back Loofah Shower Brush, Soft Nylon Mesh Back Cleaner Washer, Bath Brush for Women Men, Exfoliating Body Scrubber for Elderly (Light Pink)  
\\$7.99

- select\_item():

```

Action: click[B08Y6VZFT6]
Observation:
[Back to Search]
[< Prev]
scent [2 pack-beige][2 pack-green][2 pack-light pink][2
pcs=green+beige][2 pcs=green+pink][3 pack-beige][3 pack-light pink][3
pcs=colors][beige][green][light pink]
Prozklves Back Scrubber for Shower, Long Handle Back Loofah
Shower Brush, Soft Nylon Mesh Back Cleaner Washer, Bath Brush for
Women Men, Exfoliating Body Scrubber for Elderly (Light Pink)
Price: \$7.99
Rating: N.A.
[Description]
[Features]
[Reviews]
[Attributes]
[Buy Now]

As there is no a list of subtasks to start with, we list the
Enviroment-specific subtasks below:

- search_item()
- select_item()

```

### B.1.2 PRIMITIVE DISCOVERY PROMPT

#### ALFWorld: Skill-conditioned primitive discovery prompt

You will be given success histories in which you were placed an environment and given a task to complete. Please extract the valid environment-specific actions with the correct syntax from the trial, and list them under the corresponding subtask category. When there is already a list of environment-specific actions to start with, please keep them in your response or improve them if any syntax error detected, and you can also append new actions according to the given new trial. You should not add duplicate actions regardless of the examples. For existing actions in the list, do not add more examples. Give your response after "New summarization: "

Here is one example:

Task 1:  
Success trial:  
Plan for Completing the Task:  
1. find(apple)  
2. take(apple)

Segmented Interaction History:  
> > find(apple): find some apple  
> go to garbagecan 1  
On the garbagecan 1, you see a apple 3, and a egg 3.  
> > take(apple): take the apple  
> take apple 3 from garbagecan 1  
You pick up the apple 3 from the garbagecan 1.

New summarization:

> > find(object)  
Environment-specific actions:  
- go to [receptacle] [id]  
Example: go to garbagecan 1

> > take(object)  
Environment-specific actions:

```
- take [object] [id] from [receptacle] [id]
Example: take apple 3 from garbagecan 1
```

```
> > put(object, receptacle)
Environment-specific actions:
```

```
> > cool(object)
Environment-specific actions:
```

```
> > use(object)
Environment-specific actions:
```

```
> > clean(object)
Environment-specific actions:
```

```
> > heat(object)
Environment-specific actions:
```

### WebShop: Skill-conditioned primitive discovery prompt

You will be given success histories in which you were placed an environment and given a task to complete. Please extract the valid environment-specific actions with the correct syntax from the trial, and list them under the corresponding subtask category. When there is already a list of environment-specific actions to start with, please keep them in your response or improve them if any syntax error detected, and you can also append new actions according to the given new trial. You should not add duplicate actions regardless of the examples. For existing actions in the list, do not add more examples. Give your response after "New summarization: "

Here is one example:

Webshop

Instruction:

i would like a 3 ounce bottle of bright citrus deodorant for sensitive skin, and price lower than 50.00 dollars

[Search]

```
> > search_item(): search with a query regarding the instruction
```

```
Action: search[3 ounce bright citrus deodorant sensitive skin]
```

```
Observation:
```

```
[Back to Search]
```

```
Page 1 (Total results: 50)
```

```
[Next >]
```

```
[B078GWRC1J]
```

```
Bright Citrus Deodorant by Earth Mama | Natural and Safe for Sensitive Skin, Pregnancy and Breastfeeding, Contains Organic Calendula 3-Ounce
```

```
\$10.99
```

```
[B078GTKVXY]
```

```
Ginger Fresh Deodorant by Earth Mama | Natural and Safe for Sensitive Skin, Pregnancy and Breastfeeding, Contains Organic Calendula 3-Ounce
```

```
\$10.99
```

```
[B08KBVJ4XN]
```

```
Barrel and Oak - Aluminum-Free Deodorant, Deodorant for Men, Essential Oil-Based Scent, 24-Hour Odor Protection, Cedar & Patchouli Blend, Gentle on Sensitive Skin (Mountain Sage, 2.7 oz, 2-Pack)
```

```
\$15.95
```

```
Action: click[Back to Search]
```

```
Observation:
```

```
Webshop
```

```

Instruction:
i would like a 3 ounce bottle of bright citrus deodorant for
sensitive skin, and price lower than 50.00 dollars
[Search]

New summarization:

> > search_item()
Environment-specific actions:
  search[Query]
  # Example search[3 ounce bright citrus deodorant sensitive skin]
  click[Back to Search]
  # Example click[Back to Search]

> > select_item()
Environment-specific actions:

> > select_item_attributes()
Environment-specific actions:

> > purchase_item()
Environment-specific actions:

```

### B.1.3 SKILL-CONDITIONED POLICY IMPROVEMENT TIPS DISTILLATION PROMPT

#### ALFWorld: Policy improvement tips contrastive distillation prompt

You will be given both failure and success histories in which you were placed in an environment and given a task to complete. You should generate tips according to your task description rather than the historical interactions. By comparing the two histories, please find the mistakes in the failure trial, and summarize tips to fix the mistakes. The tips can also be the rules in this particular environment. You will need these tips later to solve a similar task. When there is already a list of tips to start with, please keep them in your response or improve them, and you can also append new tips according to the given new trials. If the new mistake you detect can be solved by any existing tips, you do not need to generate new tips. You do not have to add new tips if there is no one. Give your response after "New summarization: "

Here is one example:

Task 1:

Failure trial:

You are in the middle of a room. Looking quickly around you, you see a cabinet 10, a cabinet 9, a cabinet 8, a cabinet 7, a cabinet 6, a cabinet 5, a cabinet 4, a cabinet 3, a cabinet 2, a cabinet 1, a coffeemachine 1, a countertop 2, a countertop 1, a diningtable 2, a diningtable 1, a drawer 3, a drawer 2, a drawer 1, a fridge 1, a garbagecan 1, a microwave 1, a sinkbasin 1, a stoveburner 4, a stoveburner 3, a stoveburner 2, a stoveburner 1, and a toaster 1.

Your historical interactions:

> go to countertop 1

On the countertop 1, you see a apple 2, a butterknife 1, a cup 1, a knife 2, a knife 1, a pan 1, a potato 2, a spatula 2, a spatula 1, a spoon 2, a spoon 1, a tomato 2, a winebottle 3, and a winebottle 1.

> go to countertop 2

On the countertop 2, you see a butterknife 1, a cup 1, a fork 2, and a mug 1.

> take mug 1 from countertop 2

You pick up the mug 1 from the countertop 2.

Your task is to: heat the mug

> go to stove burner 1  
On the stoveburner 1, you see a pan 2.  
> heat mug 1 with stoveburner 1  
Nothing happens.  
> heat mug 1 with stoveburner 1  
Nothing happens.

Success trial:

You are in the middle of a room. Looking quickly around you, you see a cabinet 10, a cabinet 9, a cabinet 8, a cabinet 7, a cabinet 6, a cabinet 5, a cabinet 4, a cabinet 3, a cabinet 2, a cabinet 1, a coffeemachine 1, a countertop 2, a countertop 1, a diningtable 2, a diningtable 1, a drawer 3, a drawer 2, a drawer 1, a fridge 1, a garbagecan 1, a microwave 1, a sinkbasin 1, a stoveburner 4, a stoveburner 3, a stoveburner 2, a stoveburner 1, and a toaster 1.

Your historical interactions:

> go to countertop 1  
On the countertop 1, you see a apple 2, a butterknife 1, a cup 1, a knife 2, a knife 1, a pan 1, a potato 2, a spatula 2, a spatula 1, a spoon 2, a spoon 1, a tomato 2, a winebottle 3, and a winebottle 1.  
> go to countertop 2  
On the countertop 2, you see a butterknife 1, a cup 1, a fork 2, and a mug 1.  
> take mug 1 from countertop 2  
You pick up the mug 1 from the countertop 2.  
Your task is to: heat the mug  
> go to microwave 1  
You arrive at loc 22. The microwave 1 is closed.  
> heat mug 1 with microwave 1  
You heat the mug 1 using the microwave 1.

New summarization: In task 1, my task is to heat the mug 1. I made a mistake in heating the mug with a stoveburner, and I also got stuck in a loop where I continually did this. As shown in the success trial, the correct way is to heat a mug with a microwave. Thus, I should try different actions when getting stuck in a loop; I should use a microwave to heat a mug, and I can directly heat an object with a microwave without opening the microwave and putting the object in it.

Tips:

- Try to execute a different action when you get stuck in a loop of taking identical actions.
- Mug should be heated by a microwave rather than a stoveburner.
- You can directly heat an object with a microwave by taking the corresponding action.

Note, you should not directly include the above example tips in your response. Give your response after "New summarization: "

#### **ALFWorld: Policy improvement tips non-contrastive distillation prompt**

You will be given success histories in which you were placed in an environment and given a task to complete. Please summarize tips according to your task description rather than the historical interactions. The tips can be the rules in this particular environment. You will need these tips later to solve a similar task. When there is already a list of tips to start with, please keep them in your response or improve them, and you can also append new tips according to the given new trials. You do not have to add new tips if there is no one. Give your response after "New summarization: "

Here is one example:

Task 1:

Success trial:

You are in the middle of a room. Looking quickly around you, you see a cabinet 10, a cabinet 9, a cabinet 8, a cabinet 7, a cabinet 6, a cabinet 5, a cabinet 4, a cabinet 3, a cabinet 2, a cabinet 1, a coffeemachine 1, a countertop 2, a countertop 1, a diningtable 2, a diningtable 1, a drawer 3, a drawer 2, a drawer 1, a fridge 1, a garbagecan 1, a microwave 1, a sinkbasin 1, a stoveburner 4, a stoveburner 3, a stoveburner 2, a stoveburner 1, and a toaster 1.

Your historical interactions:

> go to countertop 1

On the countertop 1, you see a apple 2, a butterknife 1, a cup 1, a knife 2, a knife 1, a pan 1, a potato 2, a spatula 2, a spatula 1, a spoon 2, a spoon 1, a tomato 2, a winebottle 3, and a winebottle 1.

> go to countertop 2

On the countertop 2, you see a butterknife 1, a cup 1, a fork 2, and a mug 1.

> take mug 1 from countertop 2

You pick up the mug 1 from the countertop 2.

Your task is to: heat the mug

> go to microwave 1

You arrive at loc 22. The microwave 1 is closed.

> heat mug 1 with microwave 1

You heat the mug 1 using the microwave 1.

New summarization: In task 1, my task is to heat the mug 1. As shown in the success trial, the correct way is to heat a mug with a microwave. Thus, I should use a microwave to heat a mug, and I can directly heat an object with a microwave without opening the microwave and putting the object in it.

Tips:

- Mug should be heated by a microwave.
- You can directly heat an object with a microwave by taking the corresponding action.

Note, you should not directly include the above example tips in your response. Give your response after "New summarization: "

#### WebShop: Policy improvement tips contrastive distillation prompt

You will be given both failure and success histories in which you were placed in an environment and given a task to complete. You should generate tips according to your task description rather than the historical interactions. By comparing the two histories, please find the mistakes in the failure trial, and summarize general tips to fix the mistakes. The tips can also be about the rules in this particular environment. You will need these tips later to solve a similar task. When there is already a list of tips to start with, please keep them in your response or improve them, and you can also append new tips according to the given new trials. If the new mistake you detect can be solved by any existing tips, you do not need to generate new tips. You do not have to add new tips if there is no one. Give your response after "New summarization: "

Here is one example:

Task1:

Failure Trial:

Webshop

Instruction:

i would like a 3 ounce bottle of bright citrus deodorant for sensitive skin, and price lower than 50.00 dollars

```

[Search]
Your historical interactions:
Action: search[3 ounce bright citrus deodorant sensitive skin]
Observation:
[Back to Search]
Page 1 (Total results: 50)
[Next >]
[B078GWRC1J]
Bright Citrus Deodorant by Earth Mama | Natural and Safe for
Sensitive Skin, Pregnancy and Breastfeeding, Contains Organic
Calendula 3-Ounce
\$10.99
[B078GTKVXY]
Ginger Fresh Deodorant by Earth Mama | Natural and Safe for Sensitive
Skin, Pregnancy and Breastfeeding, Contains Organic Calendula 3-Ounce
\$10.99
[B08KBVJ4XN]
Barrel and Oak - Aluminum-Free Deodorant, Deodorant for Men,
Essential Oil-Based Scent, 24-Hour Odor Protection, Cedar & Patchouli
Blend, Gentle on Sensitive Skin (Mountain Sage, 2.7 oz, 2-Pack)
\$15.95
Action: click[B078GWRC1J]
Observation:
[Back to Search]
[< Prev]
scent [assorted scents][bright citrus][calming lavender][ginger
fresh][simply non-scents]
size [travel set (4-pack)][3 ounce (pack of 1)][3-ounce (2-pack)]
Bright Citrus Deodorant by Earth Mama | Natural and Safe for
Sensitive Skin, Pregnancy and Breastfeeding, Contains Organic
Calendula 3-Ounce
Price: \$10.99
Rating: N.A.
[Description]
[Features]
[Reviews]
[Buy Now]
Your task is: select_item_attributes()
Action: click[BRIGHT CITRUS]
Observation: Invalid action!

Success Trial:
Webshop
Instruction:
i would like a 3 ounce bottle of bright citrus deodorant for
sensitive skin, and price lower than 50.00 dollars
[Search]
Your historical interactions:
Action: search[3 ounce bright citrus deodorant sensitive skin]
Observation:
[Back to Search]
Page 1 (Total results: 50)
[Next >]
[B078GWRC1J]
Bright Citrus Deodorant by Earth Mama | Natural and Safe for
Sensitive Skin, Pregnancy and Breastfeeding, Contains Organic
Calendula 3-Ounce
\$10.99
[B078GTKVXY]
Ginger Fresh Deodorant by Earth Mama | Natural and Safe for Sensitive
Skin, Pregnancy and Breastfeeding, Contains Organic Calendula 3-Ounce
\$10.99

```

```

[B08KBVJ4XN]
Barrel and Oak - Aluminum-Free Deodorant, Deodorant for Men,
Essential Oil-Based Scent, 24-Hour Odor Protection, Cedar & Patchouli
Blend, Gentle on Sensitive Skin (Mountain Sage, 2.7 oz, 2-Pack)
\$15.95
Action: click[B078GWRC1J]
Observation:
[Back to Search]
[< Prev]
scent [assorted scents][bright citrus][calming lavender][ginger
fresh][simply non-scents]
size [travel set (4-pack)][3 ounce (pack of 1)][3-ounce (2-pack)]
Bright Citrus Deodorant by Earth Mama | Natural and Safe for
Sensitive Skin, Pregnancy and Breastfeeding, Contains Organic
Calendula 3-Ounce
Price: \$10.99
Rating: N.A.
[Description]
[Features]
[Reviews]
[Buy Now]
Your task is: select_item_attributes()
Action: click[bright citrus]
Observation: You have clicked bright citrus.
Action: click[3 ounce (pack of 1)]
Observation: You have clicked 3 ounce (pack of 1).

New summarization: In task 1, my task is select_item_attributes(),
I made a mistake on capitalizing the name of a scent option [bright
citrus], so that click[BRIGHT CITRUS] become invalid. As shown in
the success trial, the correct action should be click[bright citrus].
Thus, I should strictly use the exact words of each option without
making any changes.

Tips:
- You should strictly use the exact words of each available option
without making any changes.

Note, do not directly include the above example tips in your response.
Give your response after "New summarization: "

```

#### WebShop: Policy improvement tips non-contrastive distillation prompt

You will be given success histories in which you were placed in an environment and given a task to complete. Please summarize tips according to your task description rather than the historical interactions. The tips can be the rules in this particular environment. You will need these tips later to solve a similar task. When there is already a list of tips to start with, please keep them in your response or improve them, and you can also append new tips according to the given new trials. You do not have to add new tips if there is no one. Give your response after "New summarization: "

Here is one example:

```

Task1:
Success Trial:
Webshop
Instruction:
i would like a 3 ounce bottle of bright citrus deodorant for
sensitive skin, and price lower than 50.00 dollars
[Search]

```

Your historical interactions:  
Action: search[3 ounce bright citrus deodorant sensitive skin]  
Observation:  
[Back to Search]  
Page 1 (Total results: 50)  
[Next >]  
[B078GWRC1J]  
Bright Citrus Deodorant by Earth Mama | Natural and Safe for Sensitive Skin, Pregnancy and Breastfeeding, Contains Organic Calendula 3-Ounce  
\\$10.99  
[B078GTKVXY]  
Ginger Fresh Deodorant by Earth Mama | Natural and Safe for Sensitive Skin, Pregnancy and Breastfeeding, Contains Organic Calendula 3-Ounce  
\\$10.99  
[B08KBVJ4XN]  
Barrel and Oak - Aluminum-Free Deodorant, Deodorant for Men, Essential Oil-Based Scent, 24-Hour Odor Protection, Cedar & Patchouli Blend, Gentle on Sensitive Skin (Mountain Sage, 2.7 oz, 2-Pack)  
\\$15.95  
Action: click[B078GWRC1J]  
Observation:  
[Back to Search]  
[< Prev]  
scent [assorted scents][bright citrus][calming lavender][ginger fresh][simply non-scents]  
size [travel set (4-pack)][3 ounce (pack of 1)][3-ounce (2-pack)]  
Bright Citrus Deodorant by Earth Mama | Natural and Safe for Sensitive Skin, Pregnancy and Breastfeeding, Contains Organic Calendula 3-Ounce  
Price: \\$10.99  
Rating: N.A.  
[Description]  
[Features]  
[Reviews]  
[Buy Now]  
Your task is: select\_item\_attributes()  
Action: click[bright citrus]  
Observation: You have clicked bright citrus.  
Action: click[3 ounce (pack of 1)]  
Observation: You have clicked 3 ounce (pack of 1).  
  
New summarization: In task 1, my task is select\_item\_attributes(). As shown in the success trial, I selected attributes according to the instruction.  
  
Tips:  
- You should selected attributes according to instruction.  
  
Note, do not directly include the tips in the above example in your response. Give your response after "New summarization: "

#### B.1.4 PROMPTS FOR DOWNSTREAM TASK SOLVING

| ALFWorld: Base policy prompt                                                                                                                                                                                                                                                                                                                                                                                                                                   |
|----------------------------------------------------------------------------------------------------------------------------------------------------------------------------------------------------------------------------------------------------------------------------------------------------------------------------------------------------------------------------------------------------------------------------------------------------------------|
| <p>Interact with a household to complete a given task.<br/> You can call subprocedures find(object), take(object), use(object), clean(object), heat(object), cool(object) and put(object, location).<br/> Here are some examples.</p> <p>You are in the middle of a room. Looking quickly around you, you see a cabinet 4, a cabinet 3, a cabinet 2, a cabinet 1, a countertop 1, a garbagecan 1, a handtowelholder 2, a handtowelholder 1, a sinkbasin 2,</p> |

a sinkbasin 1, a toilet 1, a toiletpaperhanger 1, and a towelholder 1.

Your task is to: put some spraybottle on toilet.

> think: To solve the task, I need to find and take a sparybottle, then put it on toilet.

OK.

> call: find(spraybottle)

Subprocedure finished.

> call: take(spraybottle)

Subprocedure finished.

> call: put(spraybottle, toilet)

Subprocedure finished.

You are in the middle of a room. Looking quickly around you, you see a cabinet 4, a cabinet 3, a cabinet 2, a cabinet 1, a coffeemachine 1, a countertop 1, a diningtable 3, a diningtable 2, a diningtable 1, a drawer 1, a fridge 1, a garbagecan 1, a microwave 1, a sidetable 1, a sinkbasin 1, a stoveburner 4, a stoveburner 3, a stoveburner 2, a stoveburner 1, and a toaster 1.

Your task is to: find some apple and put it in sidetable.

> think: To solve the task, I need to find and take an apple, then put it in sidetable.

OK.

> call: find(apple)

Subprocedure finished.

> call: take(apple)

Subprocedure finished.

> call: put(apple, sidetable)

Subprocedure finished.

You are in the middle of a room. Looking quickly around you, you see a cabinet 13, a cabinet 12, a cabinet 11, a cabinet 10, a cabinet 9, a cabinet 8, a cabinet 7, a cabinet 6, a cabinet 5, a cabinet 4, a cabinet 3, a cabinet 2, a cabinet 1, a coffeemachine 1, a countertop 1, a diningtable 1, a drawer 1, a fridge 1, a garbagecan 1, a microwave 1, a shelf 3, a shelf 2, a shelf 1, a sinkbasin 1, a stoveburner 4, a stoveburner 3, a stoveburner 2, a stoveburner 1, and a toaster 1.

Your task is to: put a clean lettuce in diningtable.

> think: To solve the task, I need to find and take a lettuce, then clean it with sinkbasin, then put it in diningtable.

OK.

> call: find(lettuce)

Subprocedure finished.

> call: take(lettuce)

Subprocedure finished.

> call: clean(lettuce)

Subprocedure finished.

> call: put(lettuce, diningtable)

Subprocedure finished.

You are in the middle of a room. Looking quickly around you, you see a cabinet 10, a cabinet 9, a cabinet 8, a cabinet 7, a cabinet 6, a cabinet 5, a cabinet 4, a cabinet 3, a cabinet 2, a cabinet 1, a coffeemachine 1, a countertop 3, a countertop 2, a countertop 1, a diningtable 1, a drawer 6, a drawer 5, a drawer 4, a drawer 3, a drawer 2, a drawer 1, a fridge 1, a garbagecan 1, a microwave 1, a sinkbasin 1, a stoveburner 4, a stoveburner 3, a stoveburner 2, a stoveburner 1, and a toaster 1.

Your task is to: heat some egg and put it in diningtable.

> think: To solve the task, I need to find and take an egg, then heat it with microwave, then put it in diningtable.

OK.

```

> call: find(egg)
Subprocedure finished.
> call: take(egg)
Subprocedure finished.
> call: heat(egg)
Subprocedure finished.
> call: put(egg, diningtable)
Subprocedure finished.

```

You are in the middle of a room. Looking quickly around you, you see a cabinet 13, a cabinet 12, a cabinet 11, a cabinet 10, a cabinet 9, a cabinet 8, a cabinet 7, a cabinet 6, a cabinet 5, a cabinet 4, a cabinet 3, a cabinet 2, a cabinet 1, a coffeemachine 1, a countertop 1, a diningtable 1, a drawer 1, a fridge 1, a garbagecan 1, a microwave 1, a shelf 3, a shelf 2, a shelf 1, a sinkbasin 1, a stoveburner 4, a stoveburner 3, a stoveburner 2, a stoveburner 1, and a toaster 1.

Your task is to: put a hot apple in fridge.

> think: To solve the task, I need to find and take an apple, then heat it with microwave, then put it in fridge.

OK.

```

> call: find(apple)
Subprocedure finished.
> call: take(apple)
Subprocedure finished.
> call: heat(apple)
Subprocedure finished.
> call: put(apple, fridge)
Subprocedure finished.

```

You are in the middle of a room. Looking quickly around you, you see a cabinet 16, a cabinet 15, a cabinet 14, a cabinet 13, a cabinet 12, a cabinet 11, a cabinet 10, a cabinet 9, a cabinet 8, a cabinet 7, a cabinet 6, a cabinet 5, a cabinet 4, a cabinet 3, a cabinet 2, a cabinet 1, a coffeemachine 1, a countertop 2, a countertop 1, a diningtable 1, a drawer 5, a drawer 4, a drawer 3, a drawer 2, a drawer 1, a fridge 1, a garbagecan 1, a microwave 1, a safe 1, a sinkbasin 1, a stoveburner 4, a stoveburner 3, a stoveburner 2, a stoveburner 1, and a toaster 1.

Your task is to: cool some pan and put it in stoveburner.

> think: To solve the task, I need to find and take a pan, then cool it with fridge, then put it in stoveburner.

OK.

```

> call: find(pan)
Subprocedure finished.
> call: take(pan)
Subprocedure finished.
> call: cool(pan)
Subprocedure finished.
> call: put(pan, stoveburner)
Subprocedure finished.

```

You are in the middle of a room. Looking quickly around you, you see a coffeetable 1, a diningtable 1, a drawer 4, a drawer 3, a drawer 2, a drawer 1, a dresser 1, a garbagecan 1, a sidetable 2, a sidetable 1, and a sofa 1.

Your task is to: put two cellphone in sofa.

> think: To solve the task, I need to find and take the first cellphone, then put it in sofa, then find and take the second cellphone, then put it in sofa.

OK.

```

> call: find(cellphone1)
Subprocedure finished.

```

```

> call: take(cellphone1)
Subprocedure finished.
> call: put(cellphone1, sofa)
Subprocedure finished.
> call: find(cellphone2)
Subprocedure finished.
> call: take(cellphone2)
Subprocedure finished.
> call: put(cellphone2, sofa)
Subprocedure finished.

You are in the middle of a room. Looking quickly around you, you see
a bed 1, a desk 1, a drawer 3, a drawer 2, a drawer 1, a garbagecan
1, a safe 1, a shelf 5, a shelf 4, a shelf 3, a shelf 2, a shelf 1, a
sidetable 2, and a sidetable 1.
Your task is to: look at bowl under the desk lamp.
> think: To solve the task, I need to find and take a bowl, then find
and use a desk lamp.
OK.
> call: find(bowl)
Subprocedure finished.
> call: take(bowl)
Subprocedure finished.
> call: find(desklamp)
Subprocedure finished.
> call: use(desklamp)
Subprocedure finished.

You are in the middle of a room. Looking quickly around you, you see
a bed 1, a drawer 10, a drawer 9, a drawer 8, a drawer 7, a drawer
6, a drawer 5, a drawer 4, a drawer 3, a drawer 2, a drawer 1, a
dresser 1, a garbagecan 1, a shelf 9, a shelf 8, a shelf 7, a shelf 6,
a shelf 5, a shelf 4, a shelf 3, a shelf 2, and a shelf 1.
Your task is to: examine the pen with the desk lamp.
> think: To solve the task, I need to find and take a pen, then find
and use a desk lamp. First I need to find a pen. A pen is more likely
to appear in drawer (1-10), shelf (1-9), bed (1), garbagecan (1). I
can check one by one, starting with drawer 1.
OK.
> call: find(pen)
Subprocedure finished.
> call: take(pen)
Subprocedure finished.
> call: find(desklamp)
Subprocedure finished.
> call: use(desklamp)
Subprocedure finished.

```

There are 7 skills in ALFWorld, which are find(object), take(object), use(object), clean(object), heat(object), cool(object) and put(object, location). Each of the skill induces a skill-conditioned policy. Here we first give a general prompt template for these policies.

#### ALFWorld: skill-conditioned policy prompt template

Interact with a household to complete a given task. Please consider the following tips to solve new tasks:

```

'''
{policy improvement tips}
{primitives}
'''

```

Here are some examples.

```

'''
{examples}
'''

```

In the above template, the policy improvement tips and primitives for each skill are provided in Appendix B.4. For the examples, we use the same examples provided by ReAct. Note that ReAct uses different examples to prompt different types of ALFWorld tasks, while we reorganize the examples such that a single set of prompts is used across all types of tasks. This is because we discovered skills that are shared across tasks, allowing more generalizable knowledge.

Below we provide the full prompt of a skill-conditioned policy for skill "heat(object)". Prompts of other skills are available in our codebase, which will be released soon.

#### ALFWorld: skill-conditioned policy prompt for heat(object)

```

Interact with a household to complete a given task. Please consider
the following rules to solve new tasks:
1. Try to execute a different action when you get stuck in a loop of
taking identical actions.
2. Ensure you have the correct object in your possession before
attempting to perform actions on it.
3. Check all possible locations if you can't find an object in the
expected places.
4. You can directly heat an object with a microwave by taking the
corresponding action.
5. If an action does not work, try a different approach or command.
6. Focus on relevant locations to complete the task efficiently.
7. A cup is not the same as a mug. Make sure to find and use the
correct object for the task.
8. You can think about your plan in the first step, and after that
you can only select from the following actions in your response
(please strictly follow the syntax):
  go to [receptacle] [id]
  # Example:
  go to countertop 1
  heat [object] [id] with [receptacle] [id]
  # Example:
  heat egg 1 with microwave 1

```

Here are some examples.

```

You are in the middle of a room. Looking quickly around you, you see
a cabinet 10, a cabinet 9, a cabinet 8, a cabinet 7, a cabinet 6,
a cabinet 5, a cabinet 4, a cabinet 3, a cabinet 2, a cabinet 1, a
coffeemachine 1, a countertop 3, a countertop 2, a countertop 1, a
diningtable 1, a drawer 6, a drawer 5, a drawer 4, a drawer 3, a
drawer 2, a drawer 1, a fridge 1, a garbagecan 1, a microwave 1, a
sinkbasin 1, a stoveburner 4, a stoveburner 3, a stoveburner 2, a
stoveburner 1, and a toaster 1.
Your historical interactions:
> open fridge 1
You open the fridge 1. The fridge 1 is open. In it, you see a lettuce
2, a mug 2, and a potato 3.
> go to countertop 1
On the countertop 1, you see a bread 1, a fork 1, and a saltshaker 1.
> go to countertop 2
On the countertop 2, you see nothing.
> go to countertop 3
On the countertop 3, you see a bowl 1, a butterknife 1, a egg 2, a
kettle 2, a plate 1, a sink 1, and a spatula 2.
> take egg 2 from countertop 3
You pick up the egg 2 from the countertop 3.
Your task is: heat(egg)

```

```

> think: My task is to heat an egg. Now I take an egg (2). Next, I
need go to a microwave (1) and heat it.
OK.
> go to microwave 1
The microwave 1 is closed.
> heat egg 2 with microwave 1
You heat the egg 2 using the microwave 1.
> Done heat(egg): I have heated the desired egg (2).

You are in the middle of a room. Looking quickly around you, you see
a cabinet 13, a cabinet 12, a cabinet 11, a cabinet 10, a cabinet
9, a cabinet 8, a cabinet 7, a cabinet 6, a cabinet 5, a cabinet
4, a cabinet 3, a cabinet 2, a cabinet 1, a coffeemachine 1, a
countertop 1, a diningtable 1, a drawer 1, a fridge 1, a garbagecan
1, a microwave 1, a shelf 3, a shelf 2, a shelf 1, a sinkbasin 1, a
stoveburner 4, a stoveburner 3, a stoveburner 2, a stoveburner 1, and
a toaster 1.
Your historical interactions:
> go to fridge 1
The fridge 1 is closed.
> open fridge 1
You open the fridge 1. The fridge 1 is open. In it, you see a cup 1,
and a egg 1.
> go to diningtable 1
On the diningtable 1, you see a apple 1, a bread 1, a fork 3, a
fork 2, a fork 1, a mug 2, a peppershaker 3, a plate 2, a pot 1,
a soapbottle 3, a spatula 1, a spoon 3, a spoon 2, a spoon 1, a
winebottle 3, and a winebottle 2.
> take apple 1 from diningtable 1
You pick up the apple 1 from the diningtable 1.
Your task is: heat(apple)
> think: My task is to heat an apple. Now I take an apple (1). Next,
I need to go to a microwave (1) and heat it.
OK.
> go to microwave 1
The microwave 1 is closed.
> heat apple 1 with microwave 1
You heat the apple 1 using the microwave 1.
> Done heat(apple): I have heated the desired apple (1).
'''

```

We note that in WebShop, whether to call a skill depends on the environment feedback. Therefore, the base policy needs to act based on environment observation at the end of each skill. For example, if the current item has no available attribute to select, then the base policy will not call the *select\_item\_attributes()* skill. Otherwise it will first select attributes then purchase the item. Below is the prompt for the base policy.

| WebShop: Base policy prompt                                                                                                                                                                                                                                                                                                                                                                                                                                                                                                                                                                                                                                                                          |
|------------------------------------------------------------------------------------------------------------------------------------------------------------------------------------------------------------------------------------------------------------------------------------------------------------------------------------------------------------------------------------------------------------------------------------------------------------------------------------------------------------------------------------------------------------------------------------------------------------------------------------------------------------------------------------------------------|
| <p>Interact with a webshop to solve a task.<br/> You can call subprocedures <i>search_item()</i>, <i>select_item()</i>,<br/> <i>select_item_attributes()</i>, <i>purchase_item()</i>. Here are some examples.</p> <p>Webshop<br/> Instruction:<br/> i would like a 3 ounce bottle of bright citrus deodorant for<br/> sensitive skin, and price lower than 50.00 dollars<br/> [Search]</p> <p>Action: think[I need to first search for available items, then select<br/> the item that matches the instruction. If there are additional<br/> options for certain attributes, I also need to select them before<br/> purchase. Otherwise I can directly purchase the item.]<br/> Observation: OK.</p> |

---

```

Action: search_item()
Observation:
Subprocedure Done[I have found a list of items.]
Current Page:
[Back to Search]
Page 1 (Total results: 50)
[Next >]
[B078GWRC1J]
Bright Citrus Deodorant by Earth Mama | Natural and Safe for
Sensitive Skin, Pregnancy and Breastfeeding, Contains Organic
Calendula 3-Ounce
\$10.99
[B078GTKVXY]
Ginger Fresh Deodorant by Earth Mama | Natural and Safe for Sensitive
Skin, Pregnancy and Breastfeeding, Contains Organic Calendula 3-Ounce
\$10.99
[B08KBVJ4XN]
Barrel and Oak - Aluminum-Free Deodorant, Deodorant for Men,
Essential Oil-Based Scent, 24-Hour Odor Protection, Cedar & Patchouli
Blend, Gentle on Sensitive Skin (Mountain Sage, 2.7 oz, 2-Pack)
\$15.95

Action: select_item()
Observation:
Subprocedure Done[I have selected the required item and it matches
the instruction.]
Current Page:
[Back to Search]
[< Prev]
scent [assorted scents][bright citrus][calming lavender][ginger
fresh][simply non-scents]
size [travel set (4-pack)][3 ounce (pack of 1)][3-ounce (2-pack)]
Bright Citrus Deodorant by Earth Mama | Natural and Safe for
Sensitive Skin, Pregnancy and Breastfeeding, Contains Organic
Calendula 3-Ounce
Price: \$10.99
Rating: N.A.
[Description]
[Features]
[Reviews]
[Buy Now]

Action: select_item_attributes()
Observation:
Subprocedure Done[I have selected the additional attributes.]
Current Page:
You have clicked 3 ounce (pack of 1).

Action: purchase_item()

WebShop
Instruction:
i need some living room furniture, and price lower than 100.00
dollars

Action: think[I need to first search for available items, then select
the item that matches the instruction. If there are additional
options for certain attributes, I also need to select them before
purchase. Otherwise I can directly purchase the item.]
Observation: OK.

```

```

Action: search_item()
Observation:
Subprocedure Done[I have found a list of items.]
Current Page:
Observation:
[Back to Search]
Page 1 (Total results: 50)
[Next >]
[B09G71YGSV]
Patterned Square Pouf in Black and Gray Boho Decor Bean Bag Bedroom
Furniture Storage Ottoman Accent Chair Bean Bag Chair Papasan Chair
Living Room Rugs Floor Pillow Bedroom Chair Foot Stool
\$100.0
[B00UNYEOVE]
TOV Furniture The Gavin Collection Modern Tufted Linen Fabric
Upholstered Living Room Sofa, Beige, 85.25" x 34.5" x 27.75"
\$100.0
[B07194KS6G]
Hekman Furniture Round Coffee Table
\$100.0

Action: select_item()
Observation:
Subprocedure Done[I have selected the required item and it matches
the instruction.]
Current Page:
[Back to Search]
[< Prev]
TOV Furniture The Gavin Collection Modern Tufted Linen Fabric
Upholstered Living Room Sofa, Beige, 85.25" x 34.5" x 27.75"
Price: \$100.0
Rating: N.A.
[Description]
[Features]
[Reviews]
[Attributes]
[Buy Now]

Action: purchase_item()

```

Below is a template of the prompt for skill-conditioned policies. Then we provide an example with skill *select\_item\_attributes()*.

| WebShop: skill-conditioned policy prompt template                                                                                                                                                               |
|-----------------------------------------------------------------------------------------------------------------------------------------------------------------------------------------------------------------|
| <p>Interact with a webshop to solve a task. Please consider the following tips to solve new tasks:</p> <pre> ''' {policy improvement tips} {primitives} '''  Here are some examples.  ''' {examples} ''' </pre> |

| WebShop: skill-conditioned policy prompt for <i>select_item_attributes()</i>                           |
|--------------------------------------------------------------------------------------------------------|
| <p>Interact with a webshop to solve a task. Please consider the following tips to solve new tasks:</p> |

1. You should strictly use the exact words of each clickable option without making any changes.
2. Ensure to select all the necessary attributes as per the instruction.
3. Pay attention to the product details to ensure they match the instruction.
4. Be aware that color and size options may not always be straightforward and may include additional information or codes.
5. Be careful with the case and spacing of the words when selecting item attributes.
6. Make sure to select a product that has all the required attributes as per the instruction.
7. Use quotation marks around specific phrases when searching for items to get more accurate results.
8. Please only generate following actions in your response:
  - click[Attribute]
  - # Example click[38 m eu]
  - click[Color]
  - # Example click[brown]
  - click[Style]
  - # Example click[powerlite 1785w]
  - click[Size]
  - # Example click[8.5]
  - click[Flavor]
  - # Example click[plantain chips]
  - click[Features]
  - # Example click[Features]
  - click[Digital Storage Capacity]
  - # Example click[32 gb]
  - click[Offer Type]
  - # Example click[lockscreen ad-supported]
  - click[Description]
  - # Example click[Description]

Here are some examples.

Webshop

Instruction:

i would like a 3 ounce bottle of bright citrus deodorant for sensitive skin, and price lower than 50.00 dollars  
[Search]

Your historical interactions:

Action: search[3 ounce bright citrus deodorant sensitive skin]

Observation:

[Back to Search]

Page 1 (Total results: 50)

[Next >]

[B078GWRC1J]

Bright Citrus Deodorant by Earth Mama | Natural and Safe for Sensitive Skin, Pregnancy and Breastfeeding, Contains Organic Calendula 3-Ounce  
\$10.99

[B078GTKVXY]

Ginger Fresh Deodorant by Earth Mama | Natural and Safe for Sensitive Skin, Pregnancy and Breastfeeding, Contains Organic Calendula 3-Ounce  
\$10.99

[B08KBVJ4XN]

Barrel and Oak - Aluminum-Free Deodorant, Deodorant for Men, Essential Oil-Based Scent, 24-Hour Odor Protection, Cedar & Patchouli Blend, Gentle on Sensitive Skin (Mountain Sage, 2.7 oz, 2-Pack)  
\$15.95

Action: click[B078GWRC1J]

Observation:

```

[Back to Search]
[< Prev]
scent [assorted scents][bright citrus][calming lavender][ginger
fresh][simply non-scents]
size [travel set (4-pack)][3 ounce (pack of 1)][3-ounce (2-pack)]
Bright Citrus Deodorant by Earth Mama | Natural and Safe for
Sensitive Skin, Pregnancy and Breastfeeding, Contains Organic
Calendula 3-Ounce
Price: $10.99
Rating: N.A.
[Description]
[Features]
[Reviews]
[Buy Now]

```

Your task is: `select_attributes()`

Action: `think`[For 3 ounce bottle of bright citrus deodorant for sensitive skin, the item has options 'bright citrus' and '3 ounce (pack of 1)' and seems good to buy.]  
 Observation: OK.

Action: `click`[bright citrus]  
 Observation: You have clicked bright citrus.

Action: `click`[3 ounce (pack of 1)]  
 Observation: You have clicked 3 ounce (pack of 1).

Action: Done[I have selected the additional attributes.]

## B.2 CODE-BASED POLICY

### ALFWorld: Skill discovery

```

You are a code generator.
You based on the history of agents interacting with the environment
to generate a general code solution to solve the task.

*****
You have access to the following primitive functions:
# example: go to table 1 => go('table 1')
def go(location: str):
    return 'go to ' + location

# example: open drawer 1 => open('drawer 1')
def open(object: str):
    return 'open ' + object

# example: The cabinet 5 is closed => isclose('The cabinet 5 is
closed') return True
def isclose(observation: str):
    if "is closed" in observation:
        return True
    else:
        return False

# example: input_str = "cabinet 3, coffeemachine 1,cabinet 5,",
object_name ="coffeemachine", return "coffeemachine 1"
def extract_pattern(input_str, object_name):
    # Using RegEx pattern to find the object_name followed by a space
    and a number
    pattern = r'{} \d+'.format(object_name)

```

```

match = re.search(pattern, input_str)

# If a match is found
if match:
    return match.group() # This returns the first match found
else:
    return "No match found."

def interact_with_environment(action):
    env_last_obs, _, _, info = env.step([action])
    print(action)
    print(env_last_obs)
    return env_last_obs[0], info['won'][0]

def is_in(object, env_last_obs):
    # check whether an object is in the environment observation
    if object in env_last_obs:
        return True
    return False

# example: use desk lamp 1 => use('desk lamp 1')
def use(desklamp: str):
    return 'use ' + desklamp

# example: close drawer 1 => close('drawer 1')
def close(object: str):
    return 'close ' + object

# example: put spraybottle 1 in/on toilet 1 => put('spraybottle 1',
'toilet 1')
def put(object: str, location: str):
    return 'put ' + object + ' in/on ' + location

# example: clean cloth 1 with sinkbasin 1 => clean('cloth
1', 'sinkbasin 1')
def clean(object_1: str, sinkbasin: str):
    return 'clean ' + object_1 + ' with ' + sinkbasin

# example: take keychain 2 from sofa 1 => take('keychain 2', 'sofa
1')
def take(object: str, location: str):
    return 'take ' + object + ' from ' + location

# example: heat tomato 2 with microwave 1
def heat(object: str, microwave: str):
    return 'heat ' + object + ' with ' + microwave

# example: cool pot 1 with fridge 1
def cool(object: str, fridge: str):
    return 'cool ' + object + ' with ' + fridge

*****
Tips:
1. The basic interaction can be in the following format:
action = go(location)
env_observation = interact_with_environment(action)

2. You can extract specific object names by:
specific_object = extract_pattern(env_observation, object_to_find)

I will start showing you the interaction history of task find.

```

You can summarize new tips based on the new interaction and generate the function based on the tips and primitives.  
The function should be in the format of

```
def clean(object_to_heat):  
    # You can assume the object is already with you.  
    # Your implementation here
```

#### WebShop: Skill discovery

You are a code generator.  
You based on the history of agent interacting with the environment to generate a general code solution to solve the task.

\*\*\*\*\*  
You have access to the following primitive functions:

```
# Example select (B0054KM7IY)
def select(item_number):
    return f'click[{item_number}]'

# Example buy()
def buy():
    return f'click[Buy Now]'

# Example:
# click(brown)
# click(Flavor)
# click(rectangular)
# click(Description)
# click(32 gb)
def click(feature):
    return f'click[{feature}]'

def interact_with_environment(action):
    global env_id
    env_obs, reward, done = env.step(env_id, action)
    print(action)
    print(env_obs)
    return env_obs, reward

def search(instruction):
    #Usage: search item based on the instruction
    #Example #1:
    #Instruction: im looking for a light pink long handle back
    loofah shower brush, and price lower than 40.00 dollars
    #Return: search[light pink long handle back loofah shower brush]

def extract_requirement(instruction):
    #Usage: based on instruction, extract requirements
    #Instruction: im looking for a light pink long handle back
    loofah shower brush, and price lower than 40.00 dollars
    #Return: a list of requirement ['easy apply', 'pine tar
    scented', 'price lower than 50.00 dollars']

def requirement_match_check(item_discription, requirement):
    #Usage: Check whether an item discription (not item attributes)
    satisfy certain requirement
```

```

    #item_discription = 'JulaJuyo Back Scrubber for Shower, Long
    Handle Body Bath Brush Showering Loofah Sponge on a Stick for Men
    Women, Nylon Mesh Exfoliating Bathing Lufa Scrub Shower Cleaning
    Luffa Brush (1 Pack-White) \$7.99 '
    #requirement = 'light pink'
    #return Ture/False

def parse_items_observation_into_items_dict(items_observation):
    #Usage: parse a string of item into a dictionary.
    #items_observation="[B09GLCXKP6] ApexDesk MK Series Children's
    Height Adjustable Chair with Study Desk w/Integrated Shelf & Drawer
    (Pink Desk & MK Chair Bundle) \$419.99
    #[B0184JRW1I] ApexDesk Little Soleil DX 43" Children's Height
    Adjustable Study Desk w/ Integrated Shelf & Drawer (Desk+Chair Bundle
    { Blue) \$359.99 "
    # return {'B09GLCXKP6':'ApexDesk MK...','B0184JRW1I': 'ApexDesk
    Little...'}

def select_most_relevant_attibutes(item_description,requirements):
    #Usage: return a list of most relevant attributes you can
    directly click based on item_description
    #item_description: string
    #requirements: [requirements#1,requirements#2,requirements#3...]
    return [attribute#1,attributes#2..]

*****
Tips:
1. The basic interaction can be in the following format:
env_observation,reward = interact_with_environment(action)
2. You should focus on to generate the code for the interaction after
"Your task is:select_item()", i.e why the Action is executed (after
"Your task is:select_item()")?
3. You need to based on the interaction history before "Your task
is:select_item()" to infer why the Action is executed
4. It is a web shopping interface, you are browsing web pages.
5. You are allowed to use numpy library: import numpy as np
6. You code should be able to generate action based on the
observation and interact with env with interact_with_environment(action)

I will start show you the interaction history of task find.
You can summarize new tips based on the new interaction and generate
the function based on the tips and primitives.
The function should be in the format of

def select_item(items,instruction):
    # items: dict {'item number': discription}
    # instruction: str

    # Hints:
    1. You may maintain a dictionary where key is the item number and
    the values containing number of satified requirements
    2. Never select or click [<Prev] and [Next>]. Do not evenwrite
    [<Prev] and [Next>] in your code.

    # return the best match item number among all items. no need to
    match all requirements in the instruction

```

We encapsulate the LLM within the specified functions, exposing only the function signature and usage in the aforementioned prompt to the LLM.

#### Webshop: Skill discovery

---

```

def extract_requirement(instruction):
    user_content = f"""
        Given an instruction, you need decompose it and find the
        requirments:
        For example:

        Example #1:
        Instruction:
        i'm looking for a light pink long handle back loofah shower brush,
        and price lower than 40.00 dollars

        You return:
        requirement_1 = 'light pink'
        requirement_2 = 'long handle back loofah'
        requirement_3 = 'price lower than 40.00 dollars'

        Example #2:
        Instruction:
        i need easy apply pine tar scented mustache wax stick for men,
        and price lower than 50.00 dollars

        You return:
        {'requirement_1' : 'easy apply'
        'requirement_2': 'pine tar scented'
        'requirement_3': 'price lower than 50.00 dollars' }}

        Now given an new instruction:
        {instruction}
        You return:
        """
    res, _ = query_openai_api(user_content=user_content)
    return res

def requirement_match_check(item, requirement):
    requirement_embedding = get_embedding(requirement)
    item_embedding = get_embedding(item)
    score = cosine_similarity(requirement_embedding, item_embedding)
    print("similarity score", score)
    if score > 0.8:
        return True
    else:
        return False

def select_most_relevant_attributes(item_description, requirement):
    user_content = """
        For example:

        Example #1:
        Given item_description:
        scent [citrus & spice][essential 7][extra firm hold][lime &
        sage][mountain fresh][original blend][pine tar][unscented]
        Mountaineer Brand Stache Stick - All-Natural Convenient 1.5 Oz
        Mustache Wax Stick for Men (Extra Firm Hold)
        Price: \$16.99
        Rating: N.A.
        [Description]
        [Features]
        [Reviews]
        [Attributes]
        [Buy Now]

        And requirements:
    """

```

```

requirement_1 = 'light pink'
requirement_2 = 'long handle back loofah'
requirement_3 = 'price lower than 40.00 dollars'

```

```

You return:
[[pine tar]]

```

Example #2:

Given item\_description:

```

scent [2 pack-beige][2 pack-green][2 pack-light pink][2
pcs=green+beige][2 pcs=green+pink][3 pack-beige][3 pack-light pink][3
pcs=colors][beige][green][light pink]

```

Prozklves Back Scrubber for Shower, Long Handle Back Loofah  
Shower Brush, Soft Nylon Mesh Back Cleaner Washer, Bath Brush for  
Women Men, Exfoliating Body Scrubber for Elderly (Light Pink)

Price: \\$7.99

Rating: N.A.

[Description]

[Features]

[Reviews]

[Attributes]

[Buy Now]

And requirements:

```

requirement_1 = 'light pink'
requirement_2 = 'long handle back loofah'
requirement_3 = 'price lower than 40.00 dollars'

```

```

You return:
[[light pink]]
"""

```

### B.3 HUMAN-GENERATED POLICY IMPROVEMENT TIPS AND PRIMITIVES FOR EACH SKILL

#### B.3.1 ALFWORLD

##### ALFWorld: Policy improvement tips and primitives for skill clean(object)

1. Do not try to turn on the sinkbasin; it does not work.
2. You can directly clean an object with a sinkbasin by taking the corresponding action.
3. Avoid going to irrelevant places when you are not sure about the next action; it wastes time and does not help in accomplishing the task.
4. Focus on the task at hand and avoid unnecessary actions.
5. Check the contents of a location before moving to another one.
6. Attempt to perform the task as soon as you have the necessary item and are in the correct location.
7. You can think about your plan in the first step, and after that you can only select from the following actions in your response (please strictly follow the syntax):

```

go to [receptacle] [id]
# Example:
go to countertop 1
clean [object] [id] with [receptacle] [id]
# Example:
clean apple 1 with sinkbasin 1

```

##### ALFWorld: Policy improvement tips and primitives for skill cool(object)

1. Please complete the task with as few steps as possible.

2. You can think about your plan in the first step, and after that you can only select from the following actions in your response (please strictly follow the syntax):

```
go to [receptacle] [id]
# Example:
go to countertop 1
cool [object] [id] with [receptacle] [id]
# Example:
cool egg 1 with fridge 1
```

3. You can take action cool [object] [id] with [receptacle] [id] even when the receptacle is closed.

#### ALFWorld: Policy improvement tips and primitives for skill find(object)

1. Try to execute a different action when you stuck in a loop of taking identical actions.
2. Try to search all other locations if the object could not be found in initial likely locations.
3. Remember the location of each object you have seen in order to quickly find it later.
4. Remember the number of objects you have seen in each location, so you can directly go back the location to find another one.
5. Do not mismatch target object with similar object, for example, a mug is different with a cup.
6. Please complete the task with as few steps as possible.
7. You can think about your plan in the first step, and after that you can only select from the following actions in your response (please strictly follow the syntax):

```
go to [receptacle] [id]
# Example:
go to countertop 1
open [receptacle] [id]
# Example:
open drawer 2
```

#### ALFWorld: Policy improvement tips and primitives for skill heat(object)

1. You need to first go to a microwave to heat an object.
2. You can heat any object with microwave.
3. Do not open the microwave, directly take the heat operation.
5. Only select from the following actions in your response (please strictly follow the syntax):

```
go to [receptacle] [id]
# Example:
go to countertop 1
heat [object] [id] with [receptacle] [id]
# Example:
heat egg 1 with microwave 1
```

#### ALFWorld: Policy improvement tips and primitives for skill put(object, receptacle)

1. Try to execute a different action when you stuck in a loop of taking identical actions.
2. You can directly put an object in/on an occupied receptacle.
3. Please complete the task with as few steps as possible.
4. You can think about your plan in the first step, and after that you can only select from the following actions in your response (please strictly follow the syntax):

```
go to [receptacle] [id]
# Example:
go to countertop 1
open [receptacle] [id]
# Example:
```

```

open drawer 2
put [object] [id] in/on [receptacle] [id]
# Example:
put lettuce 1 in/on countertop 1

```

#### ALFWorld: Policy improvement tips and primitives for skill take(object)

1. Try to execute a different action when you stuck in a loop of taking identical actions.
2. You can think about your plan in the first step, and after that you can only select from the following actions in your response (please strictly follow the syntax):
 

```
take [object] [id] from [receptacle] [id]
```
- # Example:
 

```
take lettuce 1 from countertop 1
```

#### ALFWorld: Policy improvement tips and primitives for skill use(object)

1. Try to execute a different action when you stuck in a loop of taking identical actions.
2. Please complete the task with as few steps as possible.
3. You can think about your plan in the first step, and after that you can only select from the following actions in your response (please strictly follow the syntax):
 

```
use [receptacle] [id]
```
- # Example:
 

```
use desk lamp 1
```

### B.3.2 WEBSHOP

#### WebShop: Policy improvement tips and primitives for skill search\_item()

1. Please pay attention to instruction description to find the product that exactly matches with the requirement in the instruction;
2. You should pay attention to the current observation to check clickable buttons;
3. When the current selected product does not match the requirement in the instruction well, you should navigate to the results page to check other likely product candidates;
4. When there is no product that matches the requirement in the instruction well, you should search again with a new query;
5. You should click[Back to Search] before re-searching with a new query;
6. Please only generate following actions in your response:
 

```
search[Query]
```

 # Example search[3 ounce bright citrus deodorant sensitive skin]
 

```
click[Back to Search]
```

 # Example click[Back to Search]

#### WebShop: Policy improvement tips and primitives for skill select\_item()

1. Please pay attention to instruction description to find the product that exactly matches with the requirement in the instruction;
2. You can click[Description] or click[Features] to find the detailed description of a product;
3. You should pay attention to the current observation to check clickable buttons;
4. When the current selected product does not match the requirement in the instruction well, you should navigate to the results page to check other likely product candidates;
5. Please only generate following actions in your response:
 

```
click[Item ID]
```

 # Example click[B0054KM7IY]

```
click[< Prev]
# Example click[< Prev]
```

**WebShop: Policy improvement tips and primitives for skill select.item.attributes()**

1. Please pay attention to instruction description to find the product that exactly matches with the requirement in the instruction;
2. You can click[Description] to find the detailed description of a product;
3. Remember to select all required attributes using click[Attributes] before click[Buy Now];
4. You should click[Description] or click[Features] to double-check attributes when there is no clickable attributes;
5. You should pay attention to the current observation to check clickable buttons;
6. Please only generate following actions in your response:
 

```
click[Attributes]
# Example 1: click[16.9 fl oz (pack of 1)]
# Example 2: click[blue]
click[< Prev]
# Example: click[< Prev]
click[Description]
# Example: click[Description]
click[Features]
# Example: click[Features]
```

**WebShop: Policy improvement tips and primitives for skill purchase.item()**

1. Please only generate following actions in your response:
 

```
click[Buy Now]
# Example click[Buy Now]
```

## B.4 LLM-DISTILLED POLICY IMPROVEMENT TIPS AND PRIMITIVES FOR EACH SKILL

### B.4.1 ALFWORLD

**ALFWorld: Policy improvement tips and primitives for skill clean(object)**

1. Do not try to turn on the sinkbasin; it does not work.
2. You can directly clean an object with a sinkbasin by taking the corresponding action.
3. Avoid going to irrelevant places when you are not sure about the next action; it wastes time and does not help in accomplishing the task.
4. Focus on the task at hand and avoid unnecessary actions.
5. Check the contents of a location before moving to another one.
6. Attempt to perform the task as soon as you have the necessary item and are in the correct location.
7. You can think about your plan in the first step, and after that you can only select from the following actions in your response (please strictly follow the syntax):
 

```
go to [receptacle] [id]
# Example:
go to countertop 1
clean [object] [id] with [receptacle] [id]
# Example:
clean apple 1 with sinkbasin 1
```

**ALFWorld: Policy improvement tips and primitives for skill cool(object)**

1. Always remember to locate and pick up the object first before trying to perform an action on it.
2. An object can be cooled using a fridge.

3. You can directly cool an object with a fridge by taking the corresponding action.
4. Avoid getting stuck in a loop of actions that do not contribute to the completion of the task.
5. Explore the environment thoroughly to locate the object needed to complete the task.
6. If an object is not in its usual place, check other possible locations.
7. If you can't find an object in one location, it might be in another. In this case, the lettuce was on the countertop, not the fridge.
8. Avoid attempting actions that are not possible in the given environment.
9. You can think about your plan in the first step, and after that you can only select from the following actions in your response (please strictly follow the syntax):

```

go to [receptacle] [id]
# Example:
go to countertop 1
cool [object] [id] with [receptacle] [id]
# Example:
cool egg 1 with fridge 1

```

#### ALFWorld: Policy improvement tips and primitives for skill find(object)

1. Thoroughly check each location before moving on to the next.
2. Do not pick up unnecessary items.
3. Do not waste time checking locations where the item is unlikely to be found.
4. Check all possible locations when looking for an item.
5. Don't assume an item won't be in a certain location based on where similar items were found.
6. If you can't find an item, try to revisit the locations you have already checked. The item might be hidden or covered by other items.
7. Do not exclude any locations when searching for an item, even if they seem unlikely.
8. Expand your search area when you can't find an item in the expected locations.
9. Remember that items can be found in unexpected places.
10. Avoid trying to take an item from a location where it has not been found.
11. Revisit locations where similar items were found as they might contain the item you are looking for.
12. Always check all possible locations, even if they seem unlikely to contain the item.
13. Remember to check the dining table when looking for items like a remote control.
14. You can think about your plan in the first step, and after that you can only select from the following actions in your response (please strictly follow the syntax):

```

go to [receptacle] [id]
# Example:
go to countertop 1
open [receptacle] [id]
# Example:
open drawer 2

```

#### ALFWorld: Policy improvement tips and primitives for skill heat(object)

1. Try to execute a different action when you get stuck in a loop of taking identical actions.
2. Ensure you have the correct object in your possession before attempting to perform actions on it.

3. Check all possible locations if you can't find an object in the expected places.
4. You can directly heat an object with a microwave by taking the corresponding action.
5. If an action does not work, try a different approach or command.
6. Focus on relevant locations to complete the task efficiently.
7. A cup is not the same as a mug. Make sure to find and use the correct object for the task.
8. You can think about your plan in the first step, and after that you can only select from the following actions in your response (please strictly follow the syntax):

```

go to [receptacle] [id]
# Example:
go to countertop 1
heat [object] [id] with [receptacle] [id]
# Example:
heat egg 1 with microwave 1

```

#### ALFWorld: Policy improvement tips and primitives for skill put(object, receptacle)

1. When looking for an object, make sure to check all possible locations.
2. If an object is not in the expected location, it may be somewhere else in the room.
3. Avoid getting stuck in a loop of unsuccessful actions. If an action doesn't work, try a different approach.
4. Not all surfaces may be suitable for placing objects. If one doesn't work, try another.
5. Focus on the task at hand and avoid unnecessary actions, such as searching through irrelevant locations or performing unnecessary actions.
6. Use the correct preposition when placing an object on a surface. The correct action is to put the object "in/on" the surface, not just "on" the surface.
7. Do not attempt to modify the object if it is not necessary for the task.
8. When placing an object on a surface, make sure the surface is not already full. If it is, try a different surface.
9. After picking up an object, perform the necessary action immediately instead of moving around unnecessarily.
10. If you already have the object needed for the task, do not try to find more of the same object.
11. Place the object in the first available and suitable location instead of unnecessarily checking other locations.
12. Use the correct command to put an object in a cabinet. The correct command is "put [object] in/on [surface]".
13. After cleaning an object, if the task is to put it in a drawer, do it immediately instead of checking other drawers.
14. If you put an object in a device (like a microwave), remember to take it out before trying to put it in another location.
15. Do not attempt to put an object on top of the fridge. The correct action is to put the object "in/on" the fridge.
16. Do not attempt to put an object on top of other objects on a surface. The correct action is to put the object directly "in/on" the surface.
17. You can think about your plan in the first step, and after that you can only select from the following actions in your response (please strictly follow the syntax):

```

go to [receptacle] [id]
# Example:
go to countertop 1
open [receptacle] [id]
# Example:

```

```

open drawer 2
put [object] [id] in/on [receptacle] [id]
# Example:
put lettuce 1 in/on countertop 1

```

#### ALFWorld: Policy improvement tips and primitives for skill take(object)

1. Ensure the object you want to take is actually in the location you are trying to take it from.
  2. Do not get stuck in a loop of trying to take an object from a location where it is not present.
  3. Avoid unnecessary actions that do not contribute to the completion of the task.
  4. Be aware of your current location before attempting to take an object.
  5. Explore different locations if you cannot find the object in the initial locations you check.
  6. If you can't find an object, try to look for it in other possible locations.
  7. Don't waste time checking empty or irrelevant locations. Focus on the locations where the object is likely to be found.
  8. Pay attention to the task description and take the correct object.
  9. Don't confuse similar objects. Make sure to take the correct object as per the task description.
  10. Check all possible locations before attempting to take an object.
  11. Avoid unnecessary actions that are not related to the task, such as trying to put an object on various shelves when the task is to take an object.
  12. Laptops can also be found on sofas, not just on tables or in drawers.
  13. You can think about your plan in the first step, and after that you can only select from the following actions in your response (please strictly follow the syntax):
- ```

take [object] [id] from [receptacle] [id]
# Example:
take lettuce 1 from countertop 1

```

#### ALFWorld: Policy improvement tips and primitives for skill use(object)

1. Stay focused on the task and avoid unnecessary actions that are not related to the task.
  2. Some objects can be used directly without needing to be moved or interacted with other objects.
  3. If an action doesn't work, it's likely not necessary for the task. Try a different approach.
  4. Avoid getting stuck in a loop of unproductive actions. If an action doesn't produce a result, it's unlikely to do so with repeated attempts.
  5. Don't assume that a task requires complex actions or interactions between objects. Sometimes, the solution is straightforward.
  6. You can think about your plan in the first step, and after that you can only select from the following actions in your response (please strictly follow the syntax):
- ```

use [receptacle] [id]
# Example:
use desk lamp 1

```

### B.4.2 WEBSHOP

#### WebShop: Policy improvement tips and primitives for skill purchase\_item()

1. You should strictly use the exact words of each clickable option without making any changes.

2. Always remember to select the attributes of an item before purchasing it.
3. Ensure to select the correct color, size, and style options as per the task instruction before purchasing an item.
4. Do not rush to purchase an item without selecting its attributes.
5. Carefully read and understand the task instruction before making a selection.
6. Always ensure that the options you want to select are available on the page before attempting to click on them.
7. Always select all the necessary attributes of an item as per the task instruction before purchasing it.
8. Always consider the price limit in the instruction when selecting a product.
9. Use simplified and more general terms when searching for items to get more accurate results.
10. Please only generate following actions in your response:  
`click[Buy Now]`  
`# Example click[Buy Now]`

#### **WebShop: Policy improvement tips and primitives for skill `search_item()`**

1. Use specific search terms that include all the essential details of the item you are looking for.
2. Use the exact terminology when performing a search to get the most accurate results.
3. Always include all the necessary details in the search query to get the most accurate results.
4. Use quotation marks around specific search terms to get the most accurate search results.
5. Avoid being overly specific in your search terms as it may limit the search results.
6. Please only generate following actions in your response:  
`search[Query]`  
`# Example search[3 ounce bright citrus deodorant sensitive skin]`  
`click[Back to Search]`  
`# Example click[Back to Search]`

#### **WebShop: Policy improvement tips and primitives for skill `select_item_attributes()`**

1. You should strictly use the exact words of each clickable option without making any changes.
2. Ensure to select all the necessary attributes as per the instruction.
3. Pay attention to the product details to ensure they match the instruction.
4. Be aware that color and size options may not always be straightforward and may include additional information or codes.
5. Be careful with the case and spacing of the words when selecting item attributes.
6. Make sure to select a product that has all the required attributes as per the instruction.
7. Use quotation marks around specific phrases when searching for items to get more accurate results.
8. Please only generate following actions in your response:  
`click[Attribute]`  
`# Example click[38 m eu]`  
`click[Color]`  
`# Example click[brown]`  
`click[Style]`  
`# Example click[powerlite 1785w]`  
`click[Size]`  
`# Example click[8.5]`  
`click[Flavor]`

```
# Example click[plantain chips]
click[Features]
# Example click[Features]
click[Digital Storage Capacity]
# Example click[32 gb]
click[Offer Type]
# Example click[lockscreen ad-supported]
click[Description]
# Example click[Description]
```

#### WebShop: Policy improvement tips and primitives for skill `select_item()`

1. You should strictly use the exact words of each clickable option without making any changes.
2. When searching for items with specific characteristics, use quotation marks around the specific characteristic to narrow down the search results.
3. Review multiple items before making a selection to ensure the chosen item best fits the given criteria.
4. After finding the desired item, make sure to complete the task by selecting the item.
5. Avoid over-specifying the search terms to get more relevant results.
6. Always ensure to complete the task as per the instructions given.
7. Pay attention to the item details in the search results to ensure they match the given criteria.
8. Ensure the selected item strictly meets the given criteria.
9. Include all the criteria in the search query to narrow down the search results and find the most suitable item more efficiently.
10. Confirm the specific characteristics of the item by checking the item details.
11. Always consider the price limit when selecting an item.
12. After clicking on an item, make sure to select it to complete the task.
13. Please only generate following actions in your response:
 

```
click[Item ID]
# Example click[B0054KM7IY]
click[< Prev]
# Example click[< Prev]
```

## B.5 ABLATION STUDY AND DISCUSSION ON POLICY IMPROVEMENT TIPS

### B.5.1 TIP DISTILLATION ONLY (TD-ONLY) PROMPTS

#### ALFWorld: Contrastive tip distillation prompt

You will be given both failure and success histories in which you were placed in an environment and given a task to complete. By comparing the two histories, please find the mistakes in the failure trial, and summarize general tips to fix the mistakes. The tips can also be about the rules in this particular environment. You will need these tips later to solve a similar task. When there is already a list of tips to start with, please keep them in your response or improve them, and you can also append new tips according to the given new trials. You should not add duplicate tips. Give your response after "New summarization: "

Here is one example:

Task 1:

Failure trial:

You are in the middle of a room. Looking quickly around you, you see a cabinet 10, a cabinet 9, a cabinet 8, a cabinet 7, a cabinet 6,

a cabinet 5, a cabinet 4, a cabinet 3, a cabinet 2, a cabinet 1, a coffeemachine 1, a countertop 2, a countertop 1, a diningtable 2, a diningtable 1, a drawer 3, a drawer 2, a drawer 1, a fridge 1, a garbagecan 1, a microwave 1, a sinkbasin 1, a stoveburner 4, a stoveburner 3, a stoveburner 2, a stoveburner 1, and a toaster 1. Your task is to: put a hot mug on a countertop.

```
> go to countertop 1
```

On the countertop 1, you see a butterknife 1, a cup 1, a fork 2, and a mug 1.

```
> take mug 1 from countertop 1
```

You pick up the mug 1 from the countertop 1.

```
> go to stove burner 1
```

On the stoveburner 1, you see a pan 2.

```
> heat mug 1 with stoveburner 1
```

Nothing happens.

```
> heat mug 1 with stoveburner 1
```

Nothing happens.

#### Success trial:

You are in the middle of a room. Looking quickly around you, you see a cabinet 10, a cabinet 9, a cabinet 8, a cabinet 7, a cabinet 6, a cabinet 5, a cabinet 4, a cabinet 3, a cabinet 2, a cabinet 1, a coffeemachine 1, a countertop 2, a countertop 1, a diningtable 2, a diningtable 1, a drawer 3, a drawer 2, a drawer 1, a fridge 1, a garbagecan 1, a microwave 1, a sinkbasin 1, a stoveburner 4, a stoveburner 3, a stoveburner 2, a stoveburner 1, and a toaster 1. Your task is to: put a hot mug on a countertop.

```
> go to countertop 1
```

On the countertop 1, you see a butterknife 1, a cup 1, a fork 2, and a mug 1.

```
> take mug 1 from countertop 1
```

You pick up the mug 1 from the countertop 1.

```
> go to microwave 1
```

You arrive at loc 22. The microwave 1 is closed.

```
> heat mug 1 with microwave 1
```

You heat the mug 1 using the microwave 1.

```
> go to countertop 1
```

On the countertop 1, you see a butterknife 1, a cup 1, a fork 2.

```
> put mug 1 in/on countertop 1
```

You put the mug 1 in/on the countertop 1

New summarization: In task 1, I made a mistake in heating a mug with a stoveburner, and I got stuck in a loop where I continually did this. As shown in the success trial, the correct way is to heat a mug with a microwave. Thus, I should try different actions when getting stuck in a loop; I should use a microwave to heat a mug, and I can directly heat an object with a microwave without opening the microwave and putting the object in it.

#### Tips:

- Try to execute a different action when you get stuck in a loop of taking identical actions.
- Mug should be heated by a microwave rather than a stoveburner.
- You can directly heat an object with a microwave by taking the corresponding action.

#### ALFWorld: Non-contrastive tip distillation prompt

You will be given success histories in which you were placed in an environment and given a task to complete. Please summarize general tips according to the success histories. The tips can be the rules in

this particular environment. You will need these tips later to solve a similar task. When there is already a list of tips to start with, please keep them in your response or improve them, and you can also append new tips according to the given new trials. You do not have to add new tips if there is no one. You should not add duplicate tips. Give your response after "New summarization: "

Here is one example:

Task 1:

Success trial:

You are in the middle of a room. Looking quickly around you, you see a cabinet 10, a cabinet 9, a cabinet 8, a cabinet 7, a cabinet 6, a cabinet 5, a cabinet 4, a cabinet 3, a cabinet 2, a cabinet 1, a coffeemachine 1, a countertop 2, a countertop 1, a diningtable 2, a diningtable 1, a drawer 3, a drawer 2, a drawer 1, a fridge 1, a garbagecan 1, a microwave 1, a sinkbasin 1, a stoveburner 4, a stoveburner 3, a stoveburner 2, a stoveburner 1, and a toaster 1. Your task is to: put a hot mug on a countertop.

> go to countertop 1

On the countertop 1, you see a butterknife 1, a cup 1, a fork 2, and a mug 1.

> take mug 1 from countertop 1

You pick up the mug 1 from the countertop 1.

> go to microwave 1

You arrive at loc 22. The microwave 1 is closed.

> heat mug 1 with microwave 1

You heat the mug 1 using the microwave 1.

> go to countertop 1

On the countertop 1, you see a butterknife 1, a cup 1, a fork 2.

> put mug 1 in/on countertop 1

You put the mug 1 in/on the countertop 1

New summarization: In task 1, as shown in the success trial, the correct way is to heat a mug with a microwave. Thus, I should use a microwave to heat a mug, and I can directly heat an object with a microwave without opening the microwave and putting the object in it.

Tips:

- Mug should be heated by a microwave rather than a stoveburner.
- You can directly heat an object with a microwave by taking the corresponding action.

#### WebShop: Contrastive tip distillation prompt

You will be given both failure and success histories in which you were placed in an environment and given a task to complete. By comparing the two histories, please find the mistakes in the failure trial, and summarize general tips to fix the mistakes. The tips can also be about the rules in this particular environment. You will need these tips later to solve a similar task. When there is already a list of tips to start with, please keep them in your response or improve them, and you can also append new tips according to the given new trials. You should not add duplicate tips. You do not have to add new tips if there is no one. Give your response after "New summarization: "

Here is one example:

Task1:

Failure Trial:

Webshop

Instruction:

i would like a 3 ounce bottle of bright citrus deodorant for sensitive skin, and price lower than 50.00 dollars  
[Search]

Action: search[3 ounce bright citrus deodorant sensitive skin]

Observation:

[Back to Search]

Page 1 (Total results: 50)

[Next >]

[B078GWRC1J]

Bright Citrus Deodorant by Earth Mama | Natural and Safe for Sensitive Skin, Pregnancy and Breastfeeding, Contains Organic Calendula 3-Ounce

\\$10.99

[B078GTKVXY]

Ginger Fresh Deodorant by Earth Mama | Natural and Safe for Sensitive Skin, Pregnancy and Breastfeeding, Contains Organic Calendula 3-Ounce

\\$10.99

[B08KBVJ4XN]

Barrel and Oak - Aluminum-Free Deodorant, Deodorant for Men, Essential Oil-Based Scent, 24-Hour Odor Protection, Cedar & Patchouli Blend, Gentle on Sensitive Skin (Mountain Sage, 2.7 oz, 2-Pack)

\\$15.95

Action: click[B078GWRC1J]

Observation:

[Back to Search]

[< Prev]

scent [assorted scents][bright citrus][calming lavender][ginger fresh][simply non-scents]

size [travel set (4-pack)][3 ounce (pack of 1)][3-ounce (2-pack)]

Bright Citrus Deodorant by Earth Mama | Natural and Safe for Sensitive Skin, Pregnancy and Breastfeeding, Contains Organic Calendula 3-Ounce

Price: \\$10.99

Rating: N.A.

[Description]

[Features]

[Reviews]

[Buy Now]

Action: click[BRIGHT CITRUS]

Observation: Invalid action!

Action: click[BRIGHT CITRUS]

Observation: Invalid action!

Action: click[BRIGHT CITRUS]

Observation: Invalid action!

Success Trial:

Webshop

Instruction:

i would like a 3 ounce bottle of bright citrus deodorant for sensitive skin, and price lower than 50.00 dollars  
[Search]

Action: search[3 ounce bright citrus deodorant sensitive skin]

Observation:

[Back to Search]

Page 1 (Total results: 50)

[Next >]

[B078GWRC1J]  
 Bright Citrus Deodorant by Earth Mama | Natural and Safe for Sensitive Skin, Pregnancy and Breastfeeding, Contains Organic Calendula 3-Ounce  
 \ \$10.99

[B078GTKVXY]  
 Ginger Fresh Deodorant by Earth Mama | Natural and Safe for Sensitive Skin, Pregnancy and Breastfeeding, Contains Organic Calendula 3-Ounce  
 \ \$10.99

[B08KBVJ4XN]  
 Barrel and Oak - Aluminum-Free Deodorant, Deodorant for Men, Essential Oil-Based Scent, 24-Hour Odor Protection, Cedar & Patchouli Blend, Gentle on Sensitive Skin (Mountain Sage, 2.7 oz, 2-Pack)  
 \ \$15.95

Action: click[B078GWRC1J]  
 Observation:  
 [Back to Search]  
 [< Prev]  
 scent [assorted scents][bright citrus][calming lavender][ginger fresh][simply non-scents]  
 size [travel set (4-pack)][3 ounce (pack of 1)][3-ounce (2-pack)]  
 Bright Citrus Deodorant by Earth Mama | Natural and Safe for Sensitive Skin, Pregnancy and Breastfeeding, Contains Organic Calendula 3-Ounce  
 Price: \ \$10.99  
 Rating: N.A.  
 [Description]  
 [Features]  
 [Reviews]  
 [Buy Now]

Action: click[bright citrus]  
 Observation: You have clicked bright citrus.

Action: click[3 ounce (pack of 1)]  
 Observation: You have clicked 3 ounce (pack of 1).

Action: click[Buy Now]

New summarization: In task 1, I get stuck in a loop where I continued taking an invalid action click[BRIGHT CITRUS]. Thus, I should try different actions when getting stuck in a loop; I also made a mistake on capitalizing the name of a scent option [bright citrus], so that click[BRIGHT CITRUS] become invalid. As shown in the success trial, the correct action should be click[bright citrus]. Thus, I should strictly use the exact words of each option without making any changes.

Tips:  
 - Try to execute a different action when you get stuck in a loop of taking identical actions.  
 - You should strictly use the exact words of each clickable option without making any changes.

#### WebShop: Non-contrastive tip distillation prompt

You will be given success histories in which you were placed in an environment and given a task to complete. Please summarize general tips according to the success histories. The tips can also be about the rules in this particular environment. You will need these tips

later to solve a similar task. When there is already a list of tips to start with, please keep them in your response or improve them, and you can also append new tips according to the given new trials. You should not add duplicate tips. You do not have to add new tips if there is no one. Give your response after "New summarization: "

Here is one example:

Task1:

Success Trial:

Webshop

Instruction:

i would like a 3 ounce bottle of bright citrus deodorant for sensitive skin, and price lower than 50.00 dollars

[Search]

Action: search[3 ounce bright citrus deodorant sensitive skin]

Observation:

[Back to Search]

Page 1 (Total results: 50)

[Next >]

[B078GWRC1J]

Bright Citrus Deodorant by Earth Mama | Natural and Safe for Sensitive Skin, Pregnancy and Breastfeeding, Contains Organic Calendula 3-Ounce

\\$10.99

[B078GTKVXY]

Ginger Fresh Deodorant by Earth Mama | Natural and Safe for Sensitive Skin, Pregnancy and Breastfeeding, Contains Organic Calendula 3-Ounce

\\$10.99

[B08KBVJ4XN]

Barrel and Oak - Aluminum-Free Deodorant, Deodorant for Men, Essential Oil-Based Scent, 24-Hour Odor Protection, Cedar & Patchouli Blend, Gentle on Sensitive Skin (Mountain Sage, 2.7 oz, 2-Pack)

\\$15.95

Action: click[B078GWRC1J]

Observation:

[Back to Search]

[< Prev]

scent [assorted scents][bright citrus][calming lavender][ginger fresh][simply non-scents]

size [travel set (4-pack)][3 ounce (pack of 1)][3-ounce (2-pack)]

Bright Citrus Deodorant by Earth Mama | Natural and Safe for Sensitive Skin, Pregnancy and Breastfeeding, Contains Organic Calendula 3-Ounce

Price: \\$10.99

Rating: N.A.

[Description]

[Features]

[Reviews]

[Buy Now]

Action: click[bright citrus]

Observation: You have clicked bright citrus.

Action: click[3 ounce (pack of 1)]

Observation: You have clicked 3 ounce (pack of 1).

Action: click[Buy Now]

New summarization: In task 1, as shown in the success trial, I searched by several keywords, selected a relevant item and clicked required attributes before placing the order.

Tips:

- You should searched with keywords, select the relevant item to check and click attributes according to the instruction.

### B.5.2 RESULTS IN ALFWORLD

#### **ALFWorld: Distilled policy improvement tips with contrastive prompt**

Please consider the following tips to solve new tasks:

1. Try to execute a different action when you get stuck in a loop of taking identical actions.
2. When stuck in a loop, try a different action or look for the item in a different location.
3. Mug should be heated by a microwave rather than a stoveburner.
4. You can directly heat an object with a microwave by taking the corresponding action.
5. Remember to heat items in the microwave when required.
6. Use the correct command to place items on the dining table.
7. Use the correct commands to interact with items.
8. Search in all possible locations for the required item.
9. Check all possible locations for the required item, not just the most obvious ones.
10. Items can be found in unexpected places like the garbage can or microwave.
11. Remember to cool items in the fridge when required.
12. Remember to clean items when required before placing them in their final location.
13. You can clean items directly with the sinkbasin without needing to turn it on.
14. You don't need to move items to use them together.
15. Sometimes the simplest action is the correct one.
16. Perform tasks in the correct order.

#### **ALFWorld: Distilled policy improvement tips with non-contrastive prompt**

Please consider the following tips to solve new tasks:

1. Mug should be heated by a microwave rather than a stoveburner. You can directly heat an object with a microwave by taking the corresponding action. Bread can also be heated using a microwave.
2. After heating an object, it can be placed in the fridge for cooling. You can directly cool an object with a fridge by taking the corresponding action. After cooling a cup in the fridge, it can be placed back in the microwave.
3. Cellphones can be found on sidetables and beds. After finding a cellphone, place it in the dresser.
4. Toiletpaper can be found in drawers, not necessarily on toiletpaperhangers.
5. Cups can be found in microwaves, not necessarily on countertops or in cabinets.
6. Kettles can be found on stoveburners. After finding the kettles, place them in the cabinet.
7. Keychains can be found on shelves. After finding the keychains, place them in the sidetable.
8. Watches can be found in drawers and on dining tables. After finding the watches, place them on the desired shelf.

9. To clean a dish sponge, a plate, or a knife, use the sink basin. After cleaning the dish sponge, the plate, or the knife, place it on the shelf, countertop, or drawer respectively.
10. To cool a bowl or a mug, use the fridge. After cooling the bowl or the mug, place it in the cabinet.
11. Vases can be found on shelves. After finding the vase, take it to the desk where the desk lamp is located and turn on the desk lamp to examine the vase.
12. Eggs can be found in garbage cans. After finding the egg, heat it using the microwave before placing it back in the garbage can.
13. Apples can be found on countertops or in garbage cans. After finding the apple, cool it using the fridge before placing it in the microwave or heat it using the microwave before placing it back in the garbage can.
14. Forks can be found on countertops. After finding the fork, place it in the drawer.
15. Spoons can be found on countertops. After finding the spoon, clean it using the sink basin before placing it on the sidetable.
16. Lettuce can be found in the sink basin. After finding the lettuce, cool it using the fridge before placing it in the garbage can.
17. Bowls can be found in cabinets. After finding the bowl, cool it using the fridge before placing it in another cabinet.
18. Potatoes can be found on dining tables or in microwaves. After finding the potato, heat it using the microwave before placing it in the fridge or clean it using the sink basin before placing it on the sidetable.
19. Pillows can be found on beds. After finding the pillow, take it to the desk where the desk lamp is located and turn on the desk lamp to examine the pillow.
20. CDs can be found on dining tables. After finding the CD, place it on the sidetable.
21. Butterknives can be found on countertops or in drawers. After finding the butterknife, clean it using the sink basin before placing it on the countertop or dining table.
22. Credit cards can be found on sidetables. After finding the credit cards, place them on the dining table.
23. You can directly use a desk lamp to examine an object without turning it on first.
24. Pots can be found in sink basins. After finding the pot, cool it using the fridge before placing it in the cabinet.

#### ALFWorld: Human distilled tips and primitives

Please consider the following tips to solve new tasks:

1. Try to execute a different action when you stuck in a loop of taking identical actions.
2. Try to search all other locations if the object could not be found in initial likely locations.
3. Remember the location of each object you have seen in order to quickly find it later.
4. Remember the number of objects you have seen in each location, so you can directly go back the location to find another one.
5. Carefully check the outcome of an action before taking next action.
6. You can directly put an object in/on an occupied receptacle.
7. You can only take actions to the object in hand or the objects in the current scene.
8. Do not mismatch target object with similar object, for example, a mug is different with a cup.
9. Do not express sorry/apology in your response.
10. Please only generate following actions in your response and strictly follow the syntax:

```

go to [receptacle] [id]
# Example:
  go to countertop 1
open [receptacle] [id]
# Example:
  open drawer 2
clean [object] [id] with [receptacle] [id]
# Example:
  clean lettuce 1 with sinkbasin 1
take [object] [id] from [receptacle] [id]
# Example:
  take lettuce 1 from countertop 1
close [receptacle] [id]
# Example:
  close drawer 2
heat [object] [id] with [receptacle] [id]
# Example:
  heat egg 1 with microwave 1
put [object] [id] in/on [receptacle] [id]
# Example:
  put lettuce 1 in/on countertop 1
use [object] [id]
# Example:
  use deskclamp 1
cool [object] [id] with [receptacle] [id]
# Example:
  cool egg 1 with fridge 1

```

### B.5.3 RESULTS IN WEBSHOP

#### WebShop: Distilled policy improvement tips with contrastive prompt

Please consider the following tips to solve new tasks:

1. You should strictly use the exact words of each clickable option without making any changes.
2. Always ensure to select all the necessary options before making a purchase.
3. Pay attention to the specific requirements in the instruction, such as color and size, and make sure to select them correctly.
4. Use the correct search terms to find the desired product. Avoid using special characters like slashes (/) in the search term.
5. Make sure the product selected meets all the requirements in the instruction.
6. Avoid making assumptions about the available options. Always select from the options provided.
7. Always select the color or any other specific attribute mentioned in the instruction before making a purchase.
8. Ensure to select the correct style or model of the product when multiple options are available.
9. Check the product's features to ensure it meets all the requirements in the instruction before making a purchase.
10. If the search results are not satisfactory, adjust the search terms instead of repeating the same search.
11. Do not include the price limit in the search term. Instead, check the price of each item in the search results.
12. If the first product selected does not meet all the requirements, go back to the search results and select a different product.
13. Pay attention to the use of quotation marks in the search term to ensure accurate results.
14. Only select the options that are specifically mentioned in the instruction. Avoid selecting unnecessary options.

### WebShop: Distilled policy improvement tips with non-contrastive prompt

Please consider the following tips to solve new tasks:

1. You should search with specific keywords, including the color or any specific feature if required, select the relevant item to check and click required attributes before placing the order.
2. Make sure to select the correct color and feature before purchasing the item.
3. Always check the price of the item to ensure it is within the specified budget.
4. If the first selected item does not meet the requirements, go back to the search results and select another item. Repeat this process until a suitable item is found.
5. Ensure to select the correct quantity or count of the item before purchasing.
6. Make sure to select the correct size before purchasing the item.
7. When searching for a specific model of a product, include the model name in the search keywords.
8. Ensure to select the correct flavor or variety when purchasing food items.
9. Check the material of the item if it is specified in the task.
10. If the item does not meet the requirements after checking its features, go back and select another item.
11. When searching for a wig, include the color and material in the search keywords.
12. Check the features of the product to ensure it meets the requirements before purchasing.
13. Check the description of the product to ensure it meets the requirements before purchasing.
14. Always check the product's features to ensure it meets the specific requirements of the task.
15. After selecting an item, check its features to ensure it meets the task requirements before purchasing.

### WebShop: Human distilled tips and primitives

Please consider the following tips to solve new tasks:

1. Please pay attention to instruction description to find the product that exactly matches with the requirement in the instruction;
2. You can click[Description] to find the detailed description of a product;
3. Remember to select all required attributes using click[Attributes] before click[Buy Now];
4. You should click[Description] or click[Features] to double-check attributes when there is no clickable attributes;
5. You should pay attention to the current observation to check clickable buttons;
6. When the current selected product does not match the requirement in the instruction well, you should navigate to the results page to check other likely product candidates;
7. When there is no product that matches the requirement in the instruction well, you should search again with a new query;
8. You should click[Back to Search] before re-searching with a new query;
9. Please only generate following actions in your response:

```
search[Query]
# Example: search[noise cancelling cosycost usb microphone]
click[Attributes]
# Example 1: click[16.9 fl oz (pack of 1)]
# Example 2: click[blue]
```

```

click[Product Title]
# Example: click[B0972Q1T8T]
click[Back to Search]
# Example: click[Back to Search]
click[< Prev]
# Example: click[< Prev]
click[Description]
# Example: click[Description]
click[Features]
# Example: click[Features]
click[Buy Now]
# Example: click[Buy Now]

```

## B.6 GENERATED CODE

### B.6.1 ALFWORLD

Examples of generated code for each type of tasks under ALFWorld.

| ALFworld: Generated skill code                                                                                                                                                                                                                                                                                                                                                                                                                                                                                                                                                                                                                                                                                                                                                                                                                                                                                                                                                                                                                                                                                                                                                                                                                                                                                                                                                                                                                                                                                                                                                                     |
|----------------------------------------------------------------------------------------------------------------------------------------------------------------------------------------------------------------------------------------------------------------------------------------------------------------------------------------------------------------------------------------------------------------------------------------------------------------------------------------------------------------------------------------------------------------------------------------------------------------------------------------------------------------------------------------------------------------------------------------------------------------------------------------------------------------------------------------------------------------------------------------------------------------------------------------------------------------------------------------------------------------------------------------------------------------------------------------------------------------------------------------------------------------------------------------------------------------------------------------------------------------------------------------------------------------------------------------------------------------------------------------------------------------------------------------------------------------------------------------------------------------------------------------------------------------------------------------------------|
| <pre> def clean_object(specific_object_to_clean):     # Go to the sinkbasin     action = go('sinkbasin 1')     env_observation = interact_with_environment(action)      # Clean the object with the sinkbasin     action = clean(specific_object_to_clean, 'sinkbasin 1')     env_observation = interact_with_environment(action)  def cool_object(specific_object_to_cool):     # Go to the fridge     action = go('fridge 1')     env_observation = interact_with_environment(action)      # Cool the object with the fridge     action = cool(specific_object_to_cool, 'fridge 1')     env_observation = interact_with_environment(action)      return env_observation  def find_object(object_to_find, locations_to_search):     for location in locations_to_search:         action = go(location)         env_observation, _ = interact_with_environment(action)         if is_in(object_to_find, env_observation):             specific_object_name = extract_pattern(env_observation,                                                     object_to_find)             return specific_object_name, location         elif isclose(env_observation):             action = open(location)             env_observation, _ = interact_with_environment(action)             if is_in(object_to_find, env_observation):                 specific_object_name = extract_pattern(env_observation,                                                         object_to_find)             return specific_object_name, location     return None, None  def heat_object(specific_object_to_heat): </pre> |

```

    # Go to the microwave
    action = go('microwave 1')
    env_observation = interact_with_environment(action)

    # Heat the specific object with the microwave
    action = heat(specific_object_to_heat, 'microwave 1')
    env_observation = interact_with_environment(action)

def put_object(specific_object_to_put, specific_target_location):
    # Go to the target location
    action = go(specific_target_location)
    env_observation, won = interact_with_environment(action)

    # If the target location is closed, open it
    if isclose(env_observation):
        action = open(specific_target_location)
        env_observation, won = interact_with_environment(action)

    # Put the object on the target location
    action = put(specific_object_to_put, specific_target_location)
    env_observation, won = interact_with_environment(action)

    # return whether env return won or not
    return won

def take_object(specific_object_to_take, pick_location):
    action = take(specific_object_to_take, pick_location)
    env_observation = interact_with_environment(action)
    return env_observation

def use_object(specific_object_to_use):
    action = use(specific_object_to_use)
    env_observation, won = interact_with_environment(action)
    return won

```

#### ALFworld: Skill Composition

```

# Based on the historical interaction and the new task description,
the sub-task sequence should be:
# find(bowl)
# take(bowl)
# clean(bowl)
# put(bowl, cabinet 1)

# Find the bowl
specific_object_name, location = find_object('bowl', ["cabinet
6", "cabinet 5", "cabinet 4", "cabinet 3", "cabinet 2", "cabinet
1", "coffeemachine 1", "countertop 3", "countertop 2", "countertop
1", "drawer 3", "drawer 2", "drawer 1", "fridge 1", "garbagecan
1", "microwave 1", "shelf 3", "shelf 2", "shelf 1", "sinkbasin 1",
"stoveburner 4", "stoveburner 3", "stoveburner 2", "stoveburner 1",
"toaster 1"])
# Take the bowl
take_object(specific_object_name, location)
# Clean the bowl
clean_object(specific_object_name)
# Put the bowl in cabinet 1
won = put_object(specific_object_name, 'cabinet 1')

```

### B.6.2 WEBSHOP

In the WebShop, we have observed that the GPT-4 model excels in skill composition, effectively generating responses based on instructions and context. In contrast, the GPT-3.5 model exhibits proficiency in task decomposition, breaking tasks into multiple sub-tasks; however, it struggles to seamlessly integrate these skill functions within the broader context. For instance, it cannot effectively pass the output of one function as input to subsequent functions.

| Webshop: Generated skill code                                                                                                                                                                                                                                                                                                                                                                                                                                                                                                                                                                                                                                                                                                                                                                                                                                                                                                                                                                                                                                                                                                                                                                                                                                     |
|-------------------------------------------------------------------------------------------------------------------------------------------------------------------------------------------------------------------------------------------------------------------------------------------------------------------------------------------------------------------------------------------------------------------------------------------------------------------------------------------------------------------------------------------------------------------------------------------------------------------------------------------------------------------------------------------------------------------------------------------------------------------------------------------------------------------------------------------------------------------------------------------------------------------------------------------------------------------------------------------------------------------------------------------------------------------------------------------------------------------------------------------------------------------------------------------------------------------------------------------------------------------|
| <pre>def select_item(items, instruction):     # items: dict {'item number': discription}     # instruction: str      # Extract requirements from instruction     requirements = extract_requirement(instruction)      # Initialize a dictionary to store the number of satisfied     requirements for each item     satisfied_requirements = {item: 0 for item in items.keys()}      # Check each item against each requirement     for item, description in items.items():         for requirement in requirements:             if requirement_match_check(description, requirement):                 satisfied_requirements[item] += 1      # Select the item with the most satisfied requirements     selected_item = max(satisfied_requirements, key=satisfied_requirements.get)     return selected_item  def select_item_attributes(item_description, requirements):     # item_description: string     # requirements: [requirements#1,requirements#2,requirements#3,...]      # Extract the most relevant attributes from the item description     based on the requirements     relevant_attributes = select_most_relevant_attributes(item_description, requirements)      # Return the list of relevant attributes     return relevant_attributes</pre> |
| Webshop: Skill Composition (GPT-4)                                                                                                                                                                                                                                                                                                                                                                                                                                                                                                                                                                                                                                                                                                                                                                                                                                                                                                                                                                                                                                                                                                                                                                                                                                |
| <pre># Sub-task sequence based on the historical interaction and new task description: # 1. search_item: search for a space-saving ottoman bench to match blue living room # 2. select_item: select the item that's 100x45x45cm and price lower than 410.00 dollars # 3. select_item_attributes: select the attributes that match the requirements # 4. purchase_item: buy the selected item  # Start the task # Sub-task 1: search_item instruction = "i'm looking for a space-saving ottoman bench to match my blue living room. pick that one that's 100x45x45cm, and price lower than 410.00 dollars" action = search(instruction) env_obs, reward = interact_with_environment(action)</pre>                                                                                                                                                                                                                                                                                                                                                                                                                                                                                                                                                                  |

---

```

# Sub-task 2: select_item
items = parse_items_observation_into_items_dict(env_obs)
selected_item = select_item(items, instruction)
action = select(selected_item)
env_obs, reward = interact_with_environment(action)

# Sub-task 3: select_item_attributes
requirements = extract_requirement(instruction)
relevant_attributes = select_item_attributes(env_obs, requirements)
for attribute in relevant_attributes:
    action = click(attribute)
    env_obs, reward = interact_with_environment(action)

# Sub-task 4: purchase_item
action = buy()
env_obs, reward = interact_with_environment(action)

# Print the final reward
print(f"Final reward: {reward}")

```

#### Webshop: Skill Composition (GPT-3.5)

```

# Sub-task sequence:
# 1. search(instruction)
# 2. select_item()
# 3. select_item_attributes()
# 4. purchase_item()

# Code:
search('ultra hd motion detection surveillance dome camera color
black size :6mp wdr 2.8 mm, and price lower than 190.00 dollars')

select_item()

select_item_attributes(item_description, requirements)

purchase_item()
select_item()

```
